# Supplementary material for: Complex programme evaluation of a ‘new care model’ vanguard: a shared commitment to quality improvement in an integrated health and care context
Source: PubMed Central journal article supplement — BMJ Open. 2020 Mar 8;10(3):e029174. doi: 10.1136/bmjopen-2019-029174 (PMC7064121; doi:10.1136/bmjopen-2019-029174), 2020-03-08
Supplement: bmjopen-2019-029174.draft_revisions.pdf [file bmjopen-2019-029174.draft_revisions.pdf]

# BMJ Open

BMJ Open is committed to open peer review. As part of this commitment we make the peer review history of every article we publish publicly available.

When an article is published we post the peer reviewers' comments and the authors' responses online. We also post the versions of the paper that were used during peer review. These are the versions that the peer review comments apply to.

The versions of the paper that follow are the versions that were submitted during the peer review process. They are not the versions of record or the final published versions. They should not be cited or distributed as the published version of this manuscript.

BMJ Open is an open access journal and the full, final, typeset and author-corrected version of record of the manuscript is available on our site with no access controls, subscription charges or pay-per-view fees (<http://bmjopen.bmj.com>).

If you have any questions on BMJ Open's open peer review process please email [info.bmjopen@bmj.com](mailto:info.bmjopen@bmj.com)

# BMJ Open

## Complex programme evaluation of a 'New Care Model' Vanguard; a shared commitment to quality improvement in an integrated health and care context

|                                 |                                                                                                                                                                                                                                                                          |
|---------------------------------|--------------------------------------------------------------------------------------------------------------------------------------------------------------------------------------------------------------------------------------------------------------------------|
| Journal:                        | <i>BMJ Open</i>                                                                                                                                                                                                                                                          |
| Manuscript ID                   | bmjopen-2019-029174.R1                                                                                                                                                                                                                                                   |
| Article Type:                   | Communication                                                                                                                                                                                                                                                            |
| Date Submitted by the Author:   | 09-May-2019                                                                                                                                                                                                                                                              |
| Complete List of Authors:       | Fowler Davis, Sally; Sheffield Hallam University, Faculty of health and Wellbeing; Sheffield Teaching Hospitals NHS Foundation Trust, CCA Care Group<br>Hinde, Sebastian; York University, Centre for Health Economics<br>Ariss, Steven; University of Sheffield, SchARR |
| <b>Primary Subject Heading</b>: | Health services research                                                                                                                                                                                                                                                 |
| Secondary Subject Heading:      | Communication, Evidence based practice, Health economics, Health policy                                                                                                                                                                                                  |
| Keywords:                       | Evaluation, NHS Vanguard, Healthcare, Integrated care                                                                                                                                                                                                                    |
|                                 |                                                                                                                                                                                                                                                                          |

SCHOLARONE™  
Manuscripts

1  
2  
3 **Title: Complex programme evaluation of a ‘New Care Model’ Vanguard; a shared**  
4 **commitment to quality improvement in an integrated health and care context**  
5  
6

7 Sally Fowler Davis DBA, Sheffield Hallam University s.fowler-davis@shu.ac.uk

8 Seb Hinde, York Health Economics Centre, York University sebastian.hinde@york.ac.uk>

9 Steven Ariss, SchARR, University of Sheffield s.ariss@sheffield.ac.uk  
10

- 11
- 12 • **Authors’ Contributions:** SFD drafted the communication with contributions from SH  
13 and SA on the content which was based on Vanguard evaluation experience. All  
14 authors contributed to the final version and approve the submission.
  - 15 • **Funding statement:** This work was supported by NHS England as a Vanguard  
16 evaluation via the Harrogate and Rural District Vanguard.
  - 17 • **Competing Interests statement.** There are no competing interests
  - 18 • **Keywords;** Healthcare, Evaluation, Integrated care.  
19  
20  
21

22

23 **Abstract:** NHS Vanguards, under-pressure to perform, required better contracting and data  
24 management arrangements with evaluation teams, to ensure that integrated service  
25 outcomes could be reported effectively. This communication reflects the experience of  
26 evaluating an NHS Vanguard and suggests how academic teams can improve capacity for  
27 complex programme evaluation of rapid improvements in integrated services. This should  
28 be based on a shared commitment to data collection and management and robust  
29 knowledge exchange processes to report systems change and sustainability. The  
30 identifying features of the particular site have been withheld.  
31  
32  
33  
34  
35  
36  
37  
38  
39

#### 40 **Strengths and limitations**

- 41 • The identification methodological challenges in complex programme evaluation
- 42 • Learning presented from a single Vanguard site
- 43 • Recommendations for improved outcomes and capacity for systems-level evaluation  
44  
45  
46  
47  
48

#### 49 **Background**

50 In 2014/15 NHS England created funding for 50 New Care Model “Vanguard” visions of best  
51 practice in the NHS [1] built on the premise that a number of areas in England would  
52 spearhead the NHS Five Year Forward View [2] and build local quality improvement  
53 leadership capacity. While the funding for the three year projects was from central  
54 government, the inspiration for the planning and implementation of each project was based  
55 on local priorities with stakeholders from the health economy contributing to the plan, led  
56  
57  
58  
59  
60

1  
2  
3 by local decision makers and practitioners [3]. An important objective of the programme  
4 was to design new care models that could be replicated quickly across the NHS and the aim  
5 of evaluation was to generate an iterative programme theory to explain the Vanguard  
6 improvement activity; to systematically report system change methods and cost savings.  
7  
8 In most cases the evaluation methods included complex, theory-led process evaluations  
9 (4,5,6) based around the commissioning processes and the multidisciplinary teams.  
10  
11 Methods also included some health economic evaluation to assess cost of delivery and the  
12 value of the service, measured against previous service provision. Local implementation [7]  
13 was based on the idea that health communities would know and understand the  
14 opportunities for health improvement and prevention [8] and make a radical step change in  
15 systems re-design [9].  
16  
17  
18  
19  
20  
21  
22  
23  
24

## 25 **Vanguard Evaluation**

26  
27 Evaluation processes were variously negotiated by each Vanguard site in line with NHS  
28 England guidance on the evaluation design; with the ultimate goal of comparing results and  
29 finding across all sites [10]. Programme teams contracted with evaluation teams to enable  
30 the generation of quasi-scientific correlations and testing of generative causal assumptions;  
31 to establish effectiveness of intervention in a 'real-world' context. Some £60 million was  
32 allocated to the evaluations of the 50 Vanguards reporting in March 2018, by which time  
33 NHS England expected individual Vanguards to be sustainable without further national  
34 funding for transformation [11]. They were asked to resist the pressure to provide positive  
35 signs of impact, at the expense of learning [12] but the urgency of the demand for results  
36 grew as the programme progressed.  
37  
38  
39  
40  
41  
42  
43  
44  
45  
46  
47

48 Complex programme evaluation included economic evaluation but also sought to identify a  
49 range of active ingredients and disruptive 'innovations'. Local imperatives were identified  
50 across the health and care economy and Vanguard teams came under pressure to report  
51 measurable improvements through generating organisational case study of the changes in  
52 practice [13]. The design of the evaluation was agreed with the Vanguard programme team  
53 to access a range of data; planning to achieve an understanding of complex processes and  
54 the effects of changes within a primary care system (PACS).  
55  
56  
57  
58  
59  
60

### **Relationships between evaluation and delivery teams**

The evaluation was registered as a service evaluation with the research office of the Healthcare Trust and approved by the University Ethics Committee.

An utilisation-focused approach [14] to the evaluation aimed to strengthen relationships with regular communication; creating posts across organisations and fostering a culture of openness and transparency. Several qualitative data sets were collected and collated between October 2016 and November 2017 capturing the views and values of those involved in planning and delivery of the integrated community service model. The aim was to develop, test and refine a programme theory that supported implementation [15] allowing managers to identify who the primary end users of the evaluation findings might be; what evidence they require and how this could be formed into a sustained value proposition across the system.

The Programme team planned three separate service initiatives as 'rapid improvement cycles' over 18 months (the evaluation team was not involved in the first stage). The complexity of the change was compounded by separate organisational governance arrangements; a lack of clarity and accountability in decision-making processes; different tiers of management and some detachment at Board levels [16]; gatekeeping of service-delivery teams and short term contracts for practitioners making actual detailed changes to operations. The management team was constantly being reviewed by the Vanguard Board and also experiencing reduced and delayed funding from NHS England; making it difficult to manage local finances. Capacity to use the evaluation was limited and despite the evaluation team possessing a wealth of experience and knowledge regarding integrated intermediate care teams and effective multi-disciplinary and inter-organisational working, (see leadership in integrated teams [17]) the Vanguard programme team preferred to develop plans iteratively through learning-by-doing in service.

The requirement to implement a local evaluation as a condition of funding for service improvement can create a situation in which the intrinsic value of evaluation to the service innovation is not always clear for the delivery team. Recent innovations in evaluation

1  
2  
3 methodologies and approaches (such as developmental or Principles-focused evaluation  
4 [14, 18], which focus on the usefulness of evaluation evidence and the development of  
5 effective, trusting relationships are generally not well understood; it can take time for  
6 service providers to shift towards collaborative working and finding equilibrium on the  
7 trust/control nexus (at individual and organisational levels [19, 20]). Similar findings, have  
8 emerged from other NHSE national innovation programmes; demonstrating the time  
9 required to develop effective working relationships in complex evaluation situations,(see  
10 NHSE Healthcare Technologies Testbed Programme [22]).

11  
12  
13  
14  
15  
16  
17  
18  
19  
20 As a consequence, the relationship between delivery team and evaluation team did not  
21 develop. Whilst every attempt was made to access staff, patients and all available data, as  
22 is usually the case with 'real-world' evaluation, the data collection and sharing was always  
23 retrospective to the decision-making processes and secondary to programme management  
24 priorities. Rapid improvement cycles were planned without use of the interim evaluation  
25 report data and without sufficient notice to coordinate evaluation findings with decision-  
26 making requirements. The evaluation team employed an 'embedded' evaluator to access  
27 and present data but the approach achieved limited success due to the continual request for  
28 formal changes to contractual arrangements, a lack of organisational capacity to generate  
29 patient outcome data and organise new working processes. Evaluation teams require  
30 knowledge- exchange with Programme team to enable the prioritisation of data collection  
31 and the continuous improved use of local knowledge and research evidence; to enable the  
32 analysis and reporting of service outcomes.

### 33 34 35 36 37 38 39 40 41 42 43 44 45 **Data management and capacity**

46 Evaluation involves a commitment to the normalisation of data collection, visualisation and  
47 analysis, shared between partners. There was a mismatch between the data requirements  
48 for the team intervention and the system-level change which was exacerbated when the  
49 programme chose to scale back the intervention to one locality in the face of reduced  
50 funding. The Programme delivery team prioritised the national programme requirements to  
51 demonstrate rapid, large-scale changes in process-performance indicators at a system-level  
52 but this was at the expense of operational implementation difficulties and the effectiveness  
53 of the integrated team intervention. Key stakeholders were unable to agree on a set of  
54  
55  
56  
57  
58  
59  
60

1  
2  
3 outcome metrics that best reflected population health and fitted with the programme  
4 theories of change. The failure to discriminate between the different level of demands of a  
5 service transformation can result in a constant 'flux' or extreme change and even the  
6 premature closure of interventions that prove to be difficult to implement.  
7  
8  
9

10  
11  
12 Qualitative data provided an important early insight into the adoption of new processes and  
13 systems at service level for example, one member of the 'Vanguard Delivery Board'  
14 contributed through in-depth interviews;  
15  
16

17  
18  
19  
20 *"We've got a cross-organisational group that comes together. So we do share all of those*  
21 *metrics. But a lot of them they're quite complicated. ...So one of the ones that was shared*  
22 *with us was around... the percentage of beds where people are in them who could*  
23 *potentially be somewhere else. But the definition that's used wouldn't be the definition, for*  
24 *me getting that headline data is great, but once you start querying that data you realise that*  
25 *your understanding of what that means isn't actually what's being collected. ... So it's that*  
26 *understanding of each other's organisation, and what those metrics mean, not actually*  
27 *making assumptions based on what you think things mean". (Vanguard Stakeholder).*  
28  
29  
30  
31  
32  
33  
34

35  
36 Data collection and management needed to be strategically focused on consistent  
37 interventions that are able to be evaluated effectively. In this particular case the lack of  
38 capacity to identify and consistently collect population outcomes meant that Vanguard  
39 metrics did not reflect the additional benefit of the integrated service to patients and that in  
40 many cases the metrics that were being collected were not fit for purpose and failed to  
41 show how health outcomes were being achieved.  
42  
43  
44  
45  
46  
47

48  
49 Data and technology were acknowledged as needing to play a central role in realising the  
50 integrated care plan; helping clinicians use the full range of skills and target the needs of  
51 specific populations as well as reducing bureaucracy and enabling systems transformation.  
52 The critical challenge of building capacity to collect and collate data and the analytic  
53 capability to use it in commissioning decisions was central to deliver future services. Data  
54 needed to be accessible to stakeholders, paper-free at the point of care and connected to  
55 other services and systems [23]. However, many Vanguards have been slow to collect and  
56  
57  
58  
59  
60

1  
2  
3 collate anything other than service level data. Population health outcomes remain elusive,  
4 in spite of the original commitment to showing the impact that changes would have on  
5 patients, staff and the wider population.  
6  
7  
8  
9  
10

### 11 **Economic Evaluation**

12  
13  
14 A mixed method economic evaluation aligned to the national requirements started with the  
15 broad remit of exploring the costs and health related impact of the new model of care,  
16 compared to current practice. However, as reflected above, and in common with a number  
17 of other Vanguards [24], challenges in accessing meaningful patient outcome data, a time-  
18 limited period with repeated rapid redesigns, significantly hampered the analysis.  
19  
20  
21  
22  
23

24  
25 The economic evaluation considered the cost of the Vanguard programme alongside a time  
26 series analysis of secondary care (hospital) activity (e.g. emergency bed days, length of stay  
27 and admissions). It demonstrated that there was no observed impact, negative or positive,  
28 that could be directly associated with the service re-design over the time period analysed.  
29 The insufficient evidence of a return on investment was the only element of the evaluation  
30 that the programme team used to inform the on-going planning decisions, unfortunately  
31 leading to a dis-continuation of the integrated team. The inability to offset the cost of  
32 service provision and no evidence of improvement on patient health meant that the  
33 Vanguard was unable to continue beyond the programme period.  
34  
35  
36  
37  
38  
39  
40  
41  
42

43 The economic evaluation, sought a comparator site using a synthetic comparator [25] a  
44 sample area, assessing secondary care costs in an attempt to show short term benefit. The  
45 intervention was defined as integrated community services and the causality of the effect of  
46 the integrated team needed to be disentangled from other common causes of variation  
47 such as winter flu or work-force changes. A good understanding of the systems influences  
48 are critical to programme evaluations [26] but this requires considerable embedded  
49 knowledge and understanding to be shared across the programme and evaluation teams.  
50  
51  
52  
53  
54  
55  
56  
57

58 The true cost of the intervention is an important element of the economic analysis [26]. In  
59 many of the Vanguard programmes, the funding of the service was made up of a  
60



1  
2  
3 combination of central funding a locally provided in-kind provision and the implications are  
4 important for the evaluation. For example, the redeployment of staff to the new  
5 programme is typically very challenging to quantify, even in the short term. Other factors  
6 included; the incremental cost of the new service; the additional national funding and  
7 critically the ability of the programme management team to understand and confirm the  
8 costs. The marginal cost of funding the programme long-term, with many of the in-kind  
9 services being provided alongside activities may not be sustainable on a permanent basis.  
10  
11  
12  
13  
14  
15  
16

17  
18 These short term workforce changes i.e. through secondments and short term  
19 appointments go to the heart of the sustainability of what the programme is going to  
20 achieve. The National Audit Office have recently recognised that there were 'missed  
21 opportunities' [11] for the required depth and scale of transformation across the system,  
22 particularly in relation to the delivery that achieved economic sustainability and full value  
23 for money of the programme. Service outcomes related to existing staff in short term posts  
24 and variation in hospital activity was unlikely to be a good indicator of the benefits achieved  
25 through integrated team practice and the long term patient health and wellbeing.  
26  
27  
28  
29  
30  
31  
32  
33

34 While ideally any evaluation would incorporate a life-time consideration of the health of the  
35 patient, and other relevant social outcomes [27] such time-intensive research was clearly  
36 not possible in the Vanguard. One insight was fed back to support improvement in the  
37 range of quality and cost indicators needed to show the return on investment, including but  
38 not limited to patient health outcomes;  
39  
40  
41  
42  
43  
44

45 *"..... I think it's quite difficult for individual organisations to let go of control. So whilst I think*  
46 *at the moment we've got people working in an integrated office, so out of one office, I*  
47 *wouldn't yet say we've managed to get an integrated team. ....we're on that journey, and*  
48 *we are working towards becoming one team. But culturally and how everybody works, and*  
49 *how all the different organisations work, and what that looks like is quite difficult.*  
50  
51  
52  
53

54 *(Vanguard Stakeholder)*  
55  
56  
57  
58  
59  
60

## Improving capacity for complex programme evaluation

Taking the knowledge and experience into account there are four initial areas for improvement in the planning for academic evaluation to embed within policy-driven transformation programmes.

**Increase access to integrated services:** Evaluation teams require specific access to managers and the interdisciplinary workforce [28]. Consensus on General Practitioners' views and perceptions of the systems change are required to identify the variation in choices and priorities for integrated working [19]. Interdisciplinary working remains under-developed in primary care and evaluation both highlights good practice and shares information about the most effective local improvements, based on those designed to provide rapid access [29]. Clinical leadership is often under considerable operational pressure and yet critical to the success of the integration of professional practices [17] and so a commitment to allowing patient-facing teams to share experience and express priorities for integration is a core requirement.

**Develop contractual arrangements:** Evaluations designed to inform innovations in service delivery, have pre-established stages and reporting requirements. Whilst evaluations can be rapid-cycle and feedback can be informal in nature, there is a requirement to maintain a timetable of activities within a relatively stable service delivery model, to allow for setting up data collection processes and to analyse and interpret these data. The evaluation team is often able to become an additional resource through the sharing of research evidence and comparative experience from other health context. This model of evaluation practice needs to be introduced and agreed with the programme team and contracted carefully; in such a way as to make clear the purpose and value of the partnership and the purpose, particularly associated with site visits and observations [30]. Evaluation planning should include opportunities for shared learning through training and reflection; infrastructure development through engaging community and professional stakeholders and formative and summative evaluation [23].

1  
2  
3 **Economic evaluation:** Evaluation teams require programme leaders to co-design the model  
4 of health economics recognising not only the return on investment but the value of the  
5 learning and leadership within the system. The increasing value on social justice in  
6 economic terms is a significant test of the local commitment to the cost and return on  
7 sustained organisational learning [31]. There is a need for programme managers to  
8 understand the metrics by which population health improvements are being assessed and  
9 challenge the assumption that secondary care metrics, i.e. emergency admission data, is  
10 satisfactory. For example- General Practitioners who reported local benefits to their  
11 engagement with particular patients or patient groups can be quantified and used to  
12 indicate an outcome against the value proposition. The design of the economic evaluation  
13 needs to reflect the original values associated with the shared quality improvement goal  
14 which in this case had three facets; improving care, managing demand and reducing hospital  
15 admissions. The attempt to identify value and attribute costs at systems level is required  
16 before integrated care services can be sustainably commissioned [29].  
17  
18  
19  
20  
21  
22  
23  
24  
25  
26  
27  
28  
29  
30

31 **Building capacity for evidence-based change:** Complex evaluation seeks to deliver the  
32 support for decision-making for services in 'practice-based' commissioning [32] and NHS  
33 England supported Vanguards to investigate their concerns about the level of unplanned  
34 admissions and the range of interventions that could be effective in reducing these [33],  
35 with a view to re-designing care and promoting health improvement. While routinely  
36 collected metrics may be used to assess the quality and effectiveness of care provision, the  
37 choice of metric needs to be a careful consideration in relation to quality and cost impact.  
38 Programme teams should invite evaluation that reviews the research evidence and share  
39 the findings with stakeholders, committing time and structural change to achieve the kinds  
40 of education/self-management, exercise/rehabilitation and telemedicine interventions with  
41 selected patient populations [34].  
42  
43  
44  
45  
46  
47  
48  
49  
50  
51

## 52 **Conclusion**

53  
54 Complex programme evaluation was a requirement of each NHS Vanguard sites, designed  
55 relative to the local improvements that were planned with services and across health and  
56 care systems. An academic team was recruited to increase capacity, insight and report  
57 findings of a local systems transformation. Improved evaluation processes may be needed  
58  
59  
60

1  
2  
3 to showcase the value of the investment in 'new ways of working' and to sustain system  
4 outputs. Better evaluation outcomes would be achieved with a) increased access to the  
5 frontline services and the process of integration b) contractual processes that enable  
6 evaluation teams to share interim findings and engage with complex dilemmas across the  
7 system c) clarification on a range of quality outcome metrics that would inform an economic  
8 evaluation thus helping commissioning to resist the considerable pressure to view short  
9 term cost savings and d) capacity building associated with the relevant research evidence to  
10 support local planning. National evaluation is currently being undertaken to identify the  
11 sustained changes that have taken place.  
12  
13  
14  
15  
16  
17  
18  
19  
20  
21

22 *Words- 2934*

### 23 **Full references**

- 24 1. England, N. H. S. (2016). New care models: Vanguard—developing a blueprint for the  
25 future of NHS and care services. *London: NHS England*.
- 26 2..NHS England (2014) Five Year Forward View [https://www.england.nhs.uk/wp-](https://www.england.nhs.uk/wp-content/uploads/2014/10/5yfv-web.pdf)  
27 [content/uploads/2014/10/5yfv-web.pdf](https://www.england.nhs.uk/wp-content/uploads/2014/10/5yfv-web.pdf) (last accessed 10.4.19)
- 28 3. England, N. H. S. New care models: Vanguard—developing a blueprint for the future of  
29 NHS and care services; 2016.
- 30 4. Craig P, Dieppe P, Macintyre S, et al. Developing and evaluating complex interventions:  
31 new guidance: MRC, 2008.
- 32 5.Craig P, Dieppe P, Macintyre S, et al. Developing and evaluating complex interventions:  
33 the new Medical Research Council guidance. *BMJ*2008
- 34 6. Moore, G. et al (2015) Process evaluation of complex interventions: Medical Research  
35 Council guidance. *BMJ* 2015;350
- 36 7. England, N. H. S. (2015). New care models—vanguard sites. *London: NHS England*.  
37 Available online at [www. england. nhs. uk/ourwork/futurenhs/5yfv-ch3/new-care-](http://www.england.nhs.uk/ourwork/futurenhs/5yfv-ch3/new-care-models/)  
38 [models/](http://www.england.nhs.uk/ourwork/futurenhs/5yfv-ch3/new-care-models/)[Accessed 11 December 2015].
- 39 8. Iacobucci, G. (2015). NHS England announces 29 sites to spearhead integrated care  
40 models. *BMJ: British Medical Journal (Online)*, 350.
- 41 9. Iacobucci G. NHS plan calls for new models of care and greater emphasis on prevention.  
42 *BMJ* 2014;349:g6430. [www.bmj.com/content/349/bmj.g6430](http://www.bmj.com/content/349/bmj.g6430).
- 43 10. NHS England (2016) New Care Models, Strategy for Evaluation for new care model  
44 vanguards [https://www.england.nhs.uk/wp-content/uploads/2015/07/ncm-evaluation-](https://www.england.nhs.uk/wp-content/uploads/2015/07/ncm-evaluation-strategy-may-2016.pdf)  
45 [strategy-may-2016.pdf](https://www.england.nhs.uk/wp-content/uploads/2015/07/ncm-evaluation-strategy-may-2016.pdf) (last accessed 10.4.2019)
- 46  
47  
48  
49  
50  
51  
52  
53  
54  
55  
56  
57  
58  
59  
60

11. National Audit Office (2018) Developing new care models through NHS vanguards <https://www.nao.org.uk/report/developing-new-care-models-through-nhs-vanguards/> (last accessed 10.4.19)
12. Freeman L, Hinks S (2018) At the forefront of evaluating complex system change: NHS England's approach, Operational Research and Evaluation Unit | Analytical Services NHS England [http://the-sra.org.uk/wp-content/uploads/freeman\\_and\\_hinks.pdf](http://the-sra.org.uk/wp-content/uploads/freeman_and_hinks.pdf) (last accessed 10.4.19)
13. Naylor, C., Charles, A. (2018). Developing new models of care in the PACS vanguards. London: King's Fund.
14. Patton, M. Q. (2018). *Facilitating evaluation: Principles in practice*. Sage.
15. Patton, M. Q. (2013). The roots of utilization-focused evaluation. *Evaluation roots: a wider perspective of theorists*, 293-97.
16. Jones, L., Pomeroy, L., Robert, G., Burnett, S., Anderson, J. E., Morris, S., ... & Fulop, N. J. (2019). Explaining organisational responses to a board-level quality improvement intervention: findings from an evaluation in six providers in the English National Health Service. *BMJ Qual Saf*, 28(3), 198-204.
17. Smith, T., Fowler-Davis, S., Nancarrow, S., Ariss, S. M. B., & Enderby, P. (2018). Leadership in interprofessional health and social care teams: a literature review. *Leadership in Health Services*.
18. Patton MQ. Principles-focused evaluation: The guide. Guilford Publications; 2017 Oct 3.
19. Fowler Davis, S., Piercy, H., Pearson, S., Thomas, B., & Kelly, S. (2018). Factors affecting decisions to extend access to primary care: results of a qualitative evaluation of general practitioners' views. *BMJ open*, 8(3), e019084.
20. Varoutsas E, Scapens RW. Trust and control in evolving inter-organisational relationships: Evidence from the aerospace industry. *Accounting, Auditing & Accountability Journal*. 2018 Jan 15;31(1):112-40.
22. Ariss S, Perfect Patient Pathway Evaluation Report for NHS England TestBed Programme <https://www.england.nhs.uk/ourwork/innovation/test-beds/first-wave-of-test-beds/> (last accessed 6.5.19)
23. Miller, R., Weir, C., & Gulati, S. (2018). Transforming primary care: scoping review of research and practice. *Journal of Integrated Care*.
24. McCarthy, Grey and McMeekin, 'Economic Evaluation of New Models of Care: "Quick Wins" or Robust Methods' HESG Winter 2019 conference, 7th January 2019
25. Kreif N, Grieve R, Hangartner D, Turner AJ, Nikolova S, Sutton M. Examination of the synthetic control method for evaluating health policies with multiple treated units. *Health economics*. 2016 Dec;25(12):1514-28.
26. Aceijas C Assessing Evidence to improve Population Health and Wellbeing- Transforming Public Health Practice Learning Matters (2011)
27. Drummond MF, Sculpher MJ, Claxton K, Stoddart GL, Torrance GW. *Methods for the economic evaluation of health care programmes*. Oxford university press; 2015 Sep 25.

- 1  
2  
3 28. Nancarrow, S. A., Booth, A., Ariss, S., Smith, T., Enderby, P., & Roots, A. (2013). Ten  
4 principles of good interdisciplinary team work. *Human resources for Health*, 11(1), 19.  
5  
6 29. Bodenheimer, T., Ghorob, A., Willard-Grace, R., & Grumbach, K. (2014). The 10  
7 building blocks of high-performing primary care. *The Annals of Family Medicine*, 12(2),  
8 166-171.  
9  
10 30. Chapman H,M, Murphy NF , Patton MQ (2017) A guiding typography for site visits in  
11 R.K. Nelson & D.L Roseland (Eds) *Conducting and Using Evaluative Site Visits*, New  
12 Directions for Evaluation 156, 11-19  
13  
14 31. Dukhanin, V., Searle, A., Zwerling, A., Dowdy, D. W., Taylor, H. A., & Merritt, M. W.  
15 (2018). Integrating social justice concerns into economic evaluation for healthcare and public  
16 health: A systematic review. *Social Science & Medicine*, 198, 27-35.  
17  
18 32. Smith, J., Dixon, J., Mays, N., McLeod, H., Goodwin, N., McClelland, S., ... & Wyke, S.  
19 (2005). The NHS revolution: health care in the market place: Practice based commissioning:  
20 applying the research evidence. *BMJ: British Medical Journal*, 331(7529), 1397.  
21  
22 33. Purdy S, Paranjothy S, Huntley A, et al. Interventions to reduce unplanned hospital  
23 admission: a series of systematic reviews. Jun 2012.  
24  
25 34. Bardsley M, Steventon A, Smith J, Dixon J; Nuffield Trust. Evaluating integrated and  
26 community-based care: how do we know what works? Jun 2013  
27  
28  
29  
30  
31  
32  
33  
34  
35  
36  
37  
38  
39  
40  
41  
42  
43  
44  
45  
46  
47  
48  
49  
50  
51  
52  
53  
54  
55  
56  
57  
58  
59  
60

# BMJ Open

## Complex programme evaluation of a 'New Care Model' Vanguard; a shared commitment to quality improvement in an integrated health and care context

|                                 |                                                                                                                                                                                                                                                                          |
|---------------------------------|--------------------------------------------------------------------------------------------------------------------------------------------------------------------------------------------------------------------------------------------------------------------------|
| Journal:                        | <i>BMJ Open</i>                                                                                                                                                                                                                                                          |
| Manuscript ID                   | bmjopen-2019-029174.R2                                                                                                                                                                                                                                                   |
| Article Type:                   | Communication                                                                                                                                                                                                                                                            |
| Date Submitted by the Author:   | 02-Oct-2019                                                                                                                                                                                                                                                              |
| Complete List of Authors:       | Fowler Davis, Sally; Sheffield Hallam University, Faculty of health and Wellbeing; Sheffield Teaching Hospitals NHS Foundation Trust, CCA Care Group<br>Hinde, Sebastian; York University, Centre for Health Economics<br>Ariss, Steven; University of Sheffield, SchARR |
| <b>Primary Subject Heading</b>: | Health services research                                                                                                                                                                                                                                                 |
| Secondary Subject Heading:      | Communication, Evidence based practice, Health economics, Health policy                                                                                                                                                                                                  |
| Keywords:                       | Evaluation, NHS Vanguard, Healthcare, Integrated care                                                                                                                                                                                                                    |
|                                 |                                                                                                                                                                                                                                                                          |

SCHOLARONE™  
Manuscripts

1  
2  
3 **Title: Complex programme evaluation of a ‘New Care Model’ Vanguard; a shared**  
4 **commitment to quality improvement in an integrated health and care context**  
5  
6

7 Sally Fowler Davis, Sheffield Hallam University [s.fowler-davis@shu.ac.uk](mailto:s.fowler-davis@shu.ac.uk) \*

8 Seb Hinde, York Health Economics Centre, York University [sebastian.hinde@york.ac.uk](mailto:sebastian.hinde@york.ac.uk)

9 Steven Ariss, SchARR, University of Sheffield [s.ariss@sheffield.ac.uk](mailto:s.ariss@sheffield.ac.uk)  
10

- 11
- 12 • **Authors’ Contributions:** SFD drafted the communication with contributions from SH  
13 and SA on the content which was based on Vanguard evaluation experience. All  
14 authors contributed to the final version and approve the submission.
  - 15 • **Funding statement:** This work was supported by NHS England as a Vanguard  
16 evaluation.
  - 17 • **Competing Interests statement.** There are no competing interests
  - 18 • **Keywords;** Healthcare, Evaluation, Integrated care, NHS Vanguard.  
19  
20

21 \*Correspondence  
22

23  
24  
25 **Abstract:** NHS Vanguards, under-pressure to perform, required better contracting and data  
26 management arrangements with evaluation teams, to ensure that integrated service  
27 outcomes could be reported effectively. This communication reflects the experience of  
28 evaluating an NHS Vanguard and suggests how academic teams can improve capacity for  
29 complex programme evaluation of rapid improvements in integrated services. This should  
30 be based on a shared commitment to data collection and management and robust  
31 knowledge exchange processes to report systems change and sustainability. The  
32 identifying features of the particular site have been withheld.  
33  
34  
35  
36  
37  
38  
39  
40  
41

### 42 **Strengths and limitations**

- 43 • The identification methodological challenges in complex programme evaluation
- 44 • Learning presented from a single Vanguard site
- 45 • Recommendations for improved outcomes and capacity for systems-level evaluation  
46  
47  
48  
49  
50

### 51 **Background**

52  
53 The closer integration of health care and social care has been a policy goal of successive UK  
54 governments for over 40 years who in common with most advanced western countries face  
55 the challenge of an ageing population with a range of health and care needs. In 2014/15  
56 NHS England created funding for 50 New Care Model “Vanguard” visions of best practice in  
57 the NHS [1] built on the premise that a number of areas in England would spearhead the  
58  
59  
60



1  
2  
3  
4 NHS Five Year Forward View [2] and build local quality improvement leadership capacity.  
5 While the funding for the three year projects was from central government, the inspiration  
6 for the planning and implementation of each project was based on local priorities.  
7  
8 Stakeholders from the health economy contributed to the plans, with local decision makers  
9 and practitioners, aiming to work together to achieve system-level improvements [3]. An  
10 important objective of the programme was to design new care models that could be  
11 replicated quickly across the NHS. Local implementation [4] was based on the idea that  
12 health communities would know and understand the opportunities for health improvement  
13 and prevention [5] and make a radical step change in systems re-design [6]. There are a  
14 variety of reasons that progress towards integrated care has been slow, including funding  
15 and accountability arrangements and separate regulatory regimes that assess the  
16 performance of individual organisations but not the system as a whole [7]  
17  
18  
19  
20  
21

22 The Vanguard planned three separate service initiatives as 'rapid improvement cycles' over  
23 18 months (the evaluation team was not involved in the first stage). The complexity of the  
24 change was compounded by organisations collaborating without the benefit of shared  
25 governance arrangements. There was a lack of clarity and accountability in decision-making  
26 processes with different tiers of management and some detachment at Board level [8].  
27  
28 Organisational gatekeeping of service-delivery teams and short term contracts for  
29 practitioners made planning for operational delivery very problematic and local clinical  
30 leadership was reduced due to a significant reduction and delayed funding from NHS  
31 England.  
32  
33  
34  
35  
36  
37  
38  
39  
40

41 The aim of evaluation was to generate an iterative programme theory to explain the  
42 Vanguard improvement activity across a health and care system; to systematically report  
43 system change methods and cost savings. In most cases (nationally) the evaluation methods  
44 included complex, theory-led process evaluations (, 9 10,11) based around the  
45 commissioning processes and the multidisciplinary teams. Methods also included some  
46 health economic evaluation to retrospectively assess the cost of delivery and the value of  
47 the service, measured against previous service provision. This paper discusses the  
48 retrospective learning from one evaluation process in one NHS Vanguard site.  
49  
50  
51  
52  
53  
54  
55  
56

## 57 **Vanguard Evaluation**

58  
59  
60

1  
2  
3 Evaluation processes were variously negotiated by each Vanguard site in line with NHS  
4 England guidance on the evaluation design; with the ultimate goal of comparing results and  
5 finding across all sites [12]. Programme teams contracted with evaluation teams to enable  
6 the generation of quasi-scientific correlations and testing of generative causal assumptions;  
7 to establish effectiveness of intervention in a 'real-world' context. Some £60 million was  
8 allocated to the evaluations of the 50 Vanguards reporting in March 2018, by which time  
9 NHS England expected individual Vanguards to be sustainable without further national  
10 funding for transformation [13]. They were asked to resist the pressure to provide positive  
11 signs of impact, at the expense of learning [14] but the urgency of the demand for results  
12 grew as the programme progressed.  
13  
14  
15  
16  
17  
18  
19  
20  
21  
22

23 Complex programme evaluation included economic evaluation but also sought to identify a  
24 range of active ingredients and disruptive 'innovations'. Local imperatives were identified  
25 across the health and care economy, for example, re-designing community services (nursing  
26 and allied health professionals) to work closely with general practice and achieve better  
27 patient outcomes. Vanguards came under pressure to report measurable improvements  
28 through generating organisational case study of the changes in practice [15]. The co-design  
29 of the evaluation was therefore an important element of the Vanguard to enable access to  
30 systematically collected and collated data that could describe and explain the the complex  
31 processes and the effects of changes within a primary care system (PACS).  
32  
33  
34  
35  
36  
37  
38  
39  
40  
41

### 42 **Evaluation Processes**

43 The evaluation was registered as a service evaluation with the research office of the  
44 Healthcare Trust and approved by the University Ethics Committee.  
45  
46  
47  
48

49 Utilisation-focused methods [16] aim to meet the demand for the "social-constructivist"  
50 approaches that reflect the needs of implementation processes in healthcare. . To evaluate  
51 effectively, there is a need for a full understanding of evaluation's nature, purposes and  
52 concepts [17] and to establish a working relationship and understanding of the priorities  
53 and needs for data and knowledge within the health care provider group. To this end  
54 several qualitative data sets were collected and collated between October 2016 and  
55 November 2017 capturing the views and values of those involved in planning and delivery of  
56  
57  
58  
59  
60

1  
2  
3 the integrated community service model. The aim was to develop, test and refine a  
4 programme theory that supported implementation [18] allowing managers to identify who  
5 the primary end users of the evaluation findings might be; what evidence they require and  
6 how this could be formed into a sustained value proposition across the system.  
7  
8  
9

10  
11  
12  
13  
14 The requirement to implement a local evaluation was a condition of funding the Vanguard.  
15 The evaluation team were brought together because of their experience and willingness to  
16 work with a health system and collaborate in the development of evaluation objectives for  
17 the Vanguard. . Key principles of the evaluation [16, 19] included a commitment to the  
18 usefulness of evaluation evidence and the development of effective, trusting relationships  
19 with the key stakeholders. It can take time for service providers to shift towards  
20 collaborative working and finding equilibrium on the trust/control nexus (at individual and  
21 organisational levels [20, 21]). Similar findings, have emerged from other NHSE national  
22 innovation programmes; demonstrating the time required to develop effective working  
23 relationships in complex evaluation situations,(see NHSE Healthcare Technologies Testbed  
24 Programme [22]).  
25  
26  
27  
28  
29  
30  
31  
32  
33  
34  
35

36 In this case, the relationship between Vanguard and evaluation team did not develop as  
37 hoped. Whilst every attempt was made to access staff, patients and all available data, as is  
38 usually the case with implementation evaluation, there was limited capacity to use the  
39 findings in planning for Vanguard activity. Rapid improvement cycles were planned without  
40 use of the interim evaluation report data and without sufficient notice to coordinate  
41 evaluation findings with decision-making requirements. The evaluation team employed an  
42 'embedded' evaluator to access and present data but the approach achieved limited success  
43 due to the continual request for formal changes to contractual arrangements, a lack of  
44 organisational capacity to generate patient outcome data and organise new working  
45 processes. Evaluation teams require knowledge- exchange with the Vanguard to enable the  
46 prioritisation of data collection and the continuous improved use of local knowledge and  
47 research evidence; to enable the analysis and reporting of service outcomes.  
48  
49  
50  
51  
52  
53  
54  
55  
56  
57  
58  
59

#### 60 **Difficulties with Data**

1  
2  
3 Evaluation involves a shared commitment to the normalisation of data collection,  
4 visualisation and analysis, shared between partners. The Vanguard, working closely to the  
5 specification of NHS England sought to meet data required by the national programme that  
6 demonstrated rapid, large-scale changes in process-performance indicators at a system-  
7 level, i.e reduction in attendances at Emergency Departments. This was at the expense of  
8 data collection and analysis that could be used for operational planning. Key stakeholders  
9 were unable to agree on a set of outcome metrics that best reflected population health and  
10 fitted with the programme theories of change. The failure to discriminate between the  
11 different level of data need for a service transformation can result in a constant 'flux' or  
12 extreme change and contributed to the premature closure of interventions that prove to be  
13 difficult to implement.  
14  
15  
16  
17  
18  
19  
20  
21  
22  
23  
24

25 Qualitative data provided an important early insight into the adoption of new processes and  
26 systems at service level for example, one member of the 'Vanguard Delivery Board'  
27 contributed through in-depth interviews;  
28  
29  
30  
31

32 *"We've got a cross-organisational group that comes together. So we do share all of those*  
33 *metrics. But a lot of them they're quite complicated. ...So one of the ones that was shared*  
34 *with us was around... the percentage of beds where people are in them who could*  
35 *potentially be somewhere else. But the definition that's used wouldn't be the definition, for*  
36 *me getting that headline data is great, but once you start querying that data you realise that*  
37 *your understanding of what that means isn't actually what's being collected. ... So it's that*  
38 *understanding of each other's organisation, and what those metrics mean, not actually*  
39 *making assumptions based on what you think things mean". (Vanguard Stakeholder).*  
40  
41  
42  
43  
44  
45  
46  
47  
48

49 Data collection and management needed to be strategically focused on consistent  
50 interventions that are able to be evaluated effectively. In this particular case the lack of  
51 capacity to identify and consistently collect population outcomes meant that Vanguard  
52 metrics did not reflect the additional benefit of the integrated service to patients and that in  
53 many cases the metrics that were being collected were not fit for purpose and failed to  
54 show how health outcomes were being achieved.  
55  
56  
57  
58  
59  
60

1  
2  
3 The critical challenge of building capacity to collect and collate data and use it analytically to  
4 inform commissioning decisions was central to deliver future services. Data needed to be  
5 accessible to stakeholders, paper-free at the point of care and connected to other services  
6 and systems [23]. However, many Vanguard have been slow to collect and collate anything  
7 other than service level data. Population health outcomes remain elusive, in spite of the  
8 original commitment to showing the impact that changes would have on patients, staff and  
9 the wider population.  
10  
11  
12  
13  
14  
15  
16  
17

### 18 **Representing the Return on Investment**

19 A mixed method economic evaluation aligned to the national requirements started with the  
20 broad remit of exploring the costs and health related impact of the new model of care,  
21 compared to current practice. However, as reflected above, and in common with a number  
22 of other Vanguards [24], challenges in accessing meaningful patient outcome data, a time-  
23 limited period with repeated rapid redesigns, significantly hampered the analysis.  
24  
25  
26  
27  
28  
29

30 The economic evaluation considered the cost of the Vanguard programme alongside a time  
31 series analysis of secondary care (hospital) activity (e.g. emergency bed days, length of stay  
32 and admissions). It demonstrated that there was no observed impact, negative or positive,  
33 that could be directly associated with the service re-design over the time period analysed.  
34 The insufficient evidence of a return on investment was the only element of the evaluation  
35 that the programme team used to inform the on-going planning decisions, unfortunately  
36 leading to a dis-continuation of the integrated team. The inability to offset the cost of  
37 service provision and no evidence of improvement on patient health meant that the  
38 Vanguard was unable to continue beyond the programme period.  
39  
40  
41  
42  
43  
44  
45  
46  
47  
48

49 The economic evaluation, sought a comparator site using a synthetic comparator [25] a  
50 sample area, assessing secondary care costs in an attempt to show short term benefit. The  
51 intervention was defined as integrated community services and the causality of the effect of  
52 the integrated team needed to be disentangled from other common causes of variation  
53 such as winter flu or work-force changes. A good understanding of the systems influences  
54 are critical to programme evaluations [26] but this requires considerable embedded  
55 knowledge and understanding to be shared across the programme and evaluation teams.  
56  
57  
58  
59  
60

1  
2  
3  
4  
5 The true cost of the intervention is an important element of the economic analysis [26]. In  
6 many of the Vanguard programmes, the funding of the service was made up of a  
7 combination of central funding a locally provided in-kind provision and the implications are  
8 important for the evaluation. For example, the redeployment of staff to the new  
9 programme is typically very challenging to quantify, even in the short term. Other factors  
10 included; the incremental cost of the new service; the additional national funding and  
11 critically the ability of the programme management team to understand and confirm the  
12 costs. The marginal cost of funding the programme long-term, with many of the in-kind  
13 services being provided alongside activities may not be sustainable on a permanent basis.  
14  
15  
16  
17  
18  
19  
20  
21  
22

### 23 Workforce Challenges

24 Short term workforce changes i.e. through secondments and short term appointments go to  
25 the heart of the sustainability of what the programme is going to achieve. The National  
26 Audit Office have recently recognised that there were 'missed opportunities' [11] for the  
27 required depth and scale of transformation across the system, particularly in relation to the  
28 delivery that achieved economic sustainability and full value for money of the programme.  
29 Service outcomes related to existing staff in short term posts and variation in hospital  
30 activity was unlikely to be a good indicator of the benefits achieved through integrated team  
31 practice and the long term patient health and wellbeing.  
32  
33  
34  
35  
36  
37  
38  
39  
40

41 While ideally any evaluation would incorporate a life-time consideration of the health of the  
42 patient, and other relevant social outcomes [27] such time-intensive research was clearly  
43 not possible in the Vanguard. One insight was fed back to reflect the way that individual  
44 practitioners approached team practices;  
45  
46  
47  
48  
49

50  
51 *"..... I think it's quite difficult for individual organisations to let go of control. So whilst I think*  
52 *at the moment we've got people working in an integrated office, so out of one office, I*  
53 *wouldn't yet say we've managed to get an integrated team. ....we're on that journey, and*  
54 *we are working towards becoming one team. But culturally and how everybody works, and*  
55 *how all the different organisations work, and what that looks like is quite difficult.*  
56  
57  
58  
59

60 *(Vanguard Stakeholder)*

## Improving capacity for complex programme evaluation

Taking the knowledge and experience into account, this reflection identifies four initial areas for improvement in the planning for academic evaluation that seeks to report on policy-driven transformation programmes.

**Increase access to integrated services:** Evaluation teams require specific access to managers and the interdisciplinary workforce [28]. Consensus on General Practitioners' views and perceptions of the systems change are required to identify the variation in choices and priorities for integrated working [20]. Interdisciplinary working remains under-developed in primary care and evaluation both highlights good practice and shares information about the most effective local improvements, based on those designed to provide rapid access [29]. Clinical leadership is often under considerable operational pressure and yet critical to the success of the integration of professional practices [30] So, a commitment to allowing patient-facing teams to share experience and express priorities for integration is a core requirement; the use of qualitative data to represent 'telling cases' where perhaps systems leadership has led to greater integration.

**Develop contractual arrangements:** Evaluations designed to inform innovations in service delivery, can have pre-established stages and reporting requirements. Whilst evaluations can be rapid-cycle and feedback can be informal in nature, there is a requirement to maintain a timetable of activities within a relatively stable service delivery model, to allow for setting up data collection processes and to analyse and interpret these data. The evaluation team is often able to become an additional resource through the sharing of research evidence and comparative experience from other health context. This model of evaluation practice needs to be introduced and contracted carefully, in such a way as to make clear the purpose and value of the partnership, of site visits and observations [31]. Evaluation planning should include opportunities for organisational development through engaging community and professional stakeholders and formative and summative evaluation [23].

1  
2  
3  
4  
5 **Economic evaluation:** Evaluation teams require programme leaders to co-design the model  
6  
7 of health economics recognising not only the return on investment but the value of the  
8  
9 learning and leadership within the system. The increasing value on social justice in  
10  
11 economic terms is a significant test of the local commitment to the cost and return on  
12  
13 sustained organisational learning [32]. Shared understandings of the metrics by which  
14  
15 population health improvements are being assessed are now critical. They serve to  
16  
17 challenge assumptions that secondary care metrics, i.e. emergency admission data, is  
18  
19 satisfactory. The design of the economic evaluation needs to reflect the original values  
20  
21 associated with the shared quality improvement goal which in this case had three facets;  
22  
23 improving care, managing demand and reducing hospital admissions. The attempt to  
24  
25 identify value and attribute costs at systems level is required before integrated care services  
26  
27 can be sustainably commissioned [29].  
28

29 **Building capacity for evidence-based change:** Complex evaluation seeks to deliver the  
30  
31 support for decision-making for services in 'practice-based' commissioning [33] and NHS  
32  
33 England supported Vanguard sites to investigate their concerns about the level of unplanned  
34  
35 admissions. A range of interventions could be effective in reducing these [34], with a view  
36  
37 to re-designing care and promoting health improvement. Routinely collected metrics may  
38  
39 be used to assess the quality and effectiveness of care provision and the choice of metric  
40  
41 needs to be a careful consideration in relation to quality and cost impact. Vanguard  
42  
43 evaluation enables an evidence-based approach to improvement but just as health  
44  
45 professionals need a full understanding of the conditions they have to treat, academics  
46  
47 undertaking evaluation need as full an understanding of the process as possible [35]. The  
48  
49 engagement with the particular health system and a commitment to share the findings with  
50  
51 stakeholders requires time and capacity to achieve the best outcomes for selected patient  
52  
53 populations [36].  
54

## 55 **Conclusion**

56  
57 Complex programme evaluation was a requirement of each NHS Vanguard sites, designed  
58  
59 relative to the local improvements that were planned with services and across health and  
60  
care systems. An academic team was recruited to increase capacity, insight and report



1  
2  
3 findings of a local systems transformation. Improved evaluation processes may be needed  
4 to showcase the value of the investment in 'new ways of working' and to sustain system  
5 outputs. Better evaluation outcomes would be achieved with a) increased access to the  
6 frontline services and the process of integration b) contractual processes that enable  
7 evaluation teams to share interim findings and engage with complex dilemmas across the  
8 system c) clarification on a range of quality outcome metrics that would inform an economic  
9 evaluation thus helping commissioning to resist the considerable pressure to view short  
10 term cost savings and d) capacity building associated with the relevant research evidence to  
11 support local planning. National evaluation is currently being undertaken to identify the  
12 sustained changes that have taken place.  
13  
14  
15  
16  
17  
18  
19  
20  
21  
22

23 *Words- 2934*

### 24 **Acknowledgement**

25  
26  
27 The research was funded by the NIHR CLAHRC Yorkshire and Humber. [www.clahrc-yh.nihr.ac.uk](http://www.clahrc-yh.nihr.ac.uk).

28  
29 The views expressed are those of the author(s), and not necessarily those of the NIHR or the Department of  
30 Health and Social Care.  
31  
32  
33  
34  
35  
36

### 37 **Full references**

- 38  
39 1. England, N. H. S. (2016). *New care models: Vanguard—developing a blueprint for the*  
40 *future of NHS and care services. London: NHS England.*  
41  
42 2. NHS England (2014) Five Year Forward View [https://www.england.nhs.uk/wp-](https://www.england.nhs.uk/wp-content/uploads/2014/10/5yfv-web.pdf)  
43 [content/uploads/2014/10/5yfv-web.pdf](https://www.england.nhs.uk/wp-content/uploads/2014/10/5yfv-web.pdf) (last accessed 10.4.19)  
44  
45 3. England, N. H. S. *New care models: Vanguard—developing a blueprint for the future of*  
46 *NHS and care services; 2016.*  
47  
48 4. England, N. H. S. (2015). *New care models—vanguard sites. London: NHS England.*  
49 Available online at [www.england.nhs.uk/ourwork/futurenhs/5yfv-ch3/new-care-](http://www.england.nhs.uk/ourwork/futurenhs/5yfv-ch3/new-care-models/)  
50 [models/](http://www.england.nhs.uk/ourwork/futurenhs/5yfv-ch3/new-care-models/)[Accessed 11 December 2015].  
51  
52 5. Humphries, R. (2015). *Integrated health and social care in England—Progress and*  
53 *prospects. Health Policy, 119(7), 856-859.*  
54  
55 6. Iacobucci, G. (2015). *NHS England announces 29 sites to spearhead integrated care*  
56 *models. BMJ: British Medical Journal (Online), 350.*  
57  
58 7. Iacobucci G. *NHS plan calls for new models of care and greater emphasis on prevention.*  
59  
60

- 1  
2  
3 BMJ 2014;349:g6430. [www.bmj.com/content/349/bmj.g6430](http://www.bmj.com/content/349/bmj.g6430).
- 4  
5 8. Jones, L., Pomeroy, L., Robert, G., Burnett, S., Anderson, J. E., Morris, S., ... & Fulop, N.  
6 J. (2019). Explaining organisational responses to a board-level quality improvement  
7 intervention: findings from an evaluation in six providers in the English National Health  
8 Service. *BMJ Qual Saf*, 28(3), 198-204.
- 9  
10 9. Craig P, Dieppe P, Macintyre S, et al. Developing and evaluating complex interventions:  
11 new guidance: MRC, 2008.
- 12  
13 10. Craig P, Dieppe P, Macintyre S, et al. Developing and evaluating complex interventions:  
14 the new Medical Research Council guidance. *BMJ* 2008
- 15  
16 11. Moore, G. et al (2015) Process evaluation of complex interventions: Medical Research  
17 Council guidance. *BMJ* 2015;350
- 18  
19 12. NHS England (2016) New Care Models, Strategy for Evaluation for new care model  
20 vanguards [https://www.england.nhs.uk/wp-content/uploads/2015/07/nmc-evaluation-](https://www.england.nhs.uk/wp-content/uploads/2015/07/nmc-evaluation-strategy-may-2016.pdf)  
21 [strategy-may-2016.pdf](https://www.england.nhs.uk/wp-content/uploads/2015/07/nmc-evaluation-strategy-may-2016.pdf) (last accessed 10.4.2019)
- 22  
23 13. National Audit Office (2018) Developing new care models through NHS vanguards  
24 <https://www.nao.org.uk/report/developing-new-care-models-through-nhs-vanguards/> (last  
25 accessed 10.4.19)
- 26  
27 14. Freeman L, Hinks S (2018) At the forefront of evaluating complex system change: NHS  
28 England's approach, Operational Research and Evaluation Unit | Analytical Services  
29 NHS England [http://the-sra.org.uk/wp-content/uploads/freeman\\_and\\_hinks.pdf](http://the-sra.org.uk/wp-content/uploads/freeman_and_hinks.pdf) (last accessed  
30 10.4.19)
- 31  
32 15. Naylor, C., Charles, A. (2018). Developing new models of care in the PACS vanguards.  
33 London: King's Fund.
- 34  
35 16. Patton, M. Q. (2018). *Facilitating evaluation: Principles in practice*. Sage.
- 36  
37 17. McCoy, M., & Hargie, O. D. (2001). Evaluating evaluation: implications for assessing  
38 quality. *International Journal of Health Care Quality Assurance*, 14(7), 317-327.
- 39  
40 18. Patton, M. Q. (2013). The roots of utilization-focused evaluation. *Evaluation roots: a*  
41 *wider perspective of theorists*, 293-97.
- 42  
43 19. Patton MQ. *Principles-focused evaluation: The guide*. Guilford Publications; 2017 Oct 3.
- 44  
45 20. Fowler Davis, S., Piercy, H., Pearson, S., Thomas, B., & Kelly, S. (2018). Factors  
46 affecting decisions to extend access to primary care: results of a qualitative evaluation of  
47 general practitioners' views. *BMJ open*, 8(3), e019084.
- 48  
49 21. Varoutsas E, Scapens RW. Trust and control in evolving inter-organisational relationships:  
50 Evidence from the aerospace industry. *Accounting, Auditing & Accountability Journal*. 2018  
51 Jan 15;31(1):112-40.
- 52  
53 22. Ariss S, Perfect Patient Pathway Evaluation Report for NHS England TestBed  
54 Programme [https://www.england.nhs.uk/ourwork/innovation/test-beds/first-wave-of-test-](https://www.england.nhs.uk/ourwork/innovation/test-beds/first-wave-of-test-beds/)  
55 [beds/](https://www.england.nhs.uk/ourwork/innovation/test-beds/first-wave-of-test-beds/) (last accessed 6.5.19)
- 56  
57  
58  
59  
60

- 1  
2  
3 23. Miller, R., Weir, C., & Gulati, S. (2018). Transforming primary care: scoping review of  
4 research and practice. *Journal of Integrated Care*.
- 5  
6 24. McCarthy, Grey and McMeekin, 'Economic Evaluation of New Models of Care: "Quick  
7 Wins" or Robust Methods' HESG Winter 2019 conference, 7th January 2019
- 8  
9 25. Kreif N, Grieve R, Hangartner D, Turner AJ, Nikolova S, Sutton M. Examination of the  
10 synthetic control method for evaluating health policies with multiple treated units. *Health*  
11 *economics*. 2016 Dec;25(12):1514-28.
- 12  
13 26. Aceijas C Assessing Evidence to improve Population Health and Wellbeing-  
14 Transforming Public Health Practice Learning Matters (2011)
- 15  
16 27. Drummond MF, Sculpher MJ, Claxton K, Stoddart GL, Torrance GW. Methods for the  
17 economic evaluation of health care programmes. Oxford university press; 2015 Sep 25.
- 18  
19 28. Nancarrow, S. A., Booth, A., Ariss, S., Smith, T., Enderby, P., & Roots, A. (2013). Ten  
20 principles of good interdisciplinary team work. *Human resources for Health*, 11(1), 19.
- 21  
22 29. Bodenheimer, T., Ghorob, A., Willard-Grace, R., & Grumbach, K. (2014). The 10  
23 building blocks of high-performing primary care. *The Annals of Family Medicine*, 12(2),  
24 166-171.
- 25  
26 30. Smith, T., Fowler-Davis, S., Nancarrow, S., Ariss, S. M. B., & Enderby, P. (2018).  
27 Leadership in interprofessional health and social care teams: a literature review. *Leadership*  
28 *in Health Services*.
- 29  
30 31. Chapman H, M, Murphy NF, Patton MQ (2017) A guiding typography for site visits in  
31 R.K. Nelson & D.L Roseland (Eds) *Conducting and Using Evaluative Site Visits*, New  
32 Directions for Evaluation 156, 11-19
- 33  
34 32. Dukhanin, V., Searle, A., Zwerling, A., Dowdy, D. W., Taylor, H. A., & Merritt, M. W.  
35 (2018). Integrating social justice concerns into economic evaluation for healthcare and public  
36 health: A systematic review. *Social Science & Medicine*, 198, 27-35.
- 37  
38 33. Smith, J., Dixon, J., Mays, N., McLeod, H., Goodwin, N., McClelland, S., ... & Wyke, S.  
39 (2005). The NHS revolution: health care in the market place: Practice based commissioning:  
40 applying the research evidence. *BMJ: British Medical Journal*, 331(7529), 1397.
- 41  
42 34. Purdy S, Paranjothy S, Huntley A, et al. Interventions to reduce unplanned hospital  
43 admission: a series of systematic reviews. Jun 2012.
- 44  
45 35. McCoy, M., & Hargie, O. D. (2001). Evaluating evaluation: implications for assessing  
46 quality. *International Journal of Health Care Quality Assurance*, 14(7), 317-327.
- 47  
48 36. Bardsley M, Steventon A, Smith J, Dixon J; Nuffield Trust. Evaluating integrated and  
49 community-based care: how do we know what works? Jun 2013
- 50  
51  
52  
53  
54  
55  
56  
57  
58  
59  
60

# BMJ Open

## Complex programme evaluation of a 'New Care Model' Vanguard; a shared commitment to quality improvement in an integrated health and care context

|                                 |                                                                                                                                                                                                                                                                          |
|---------------------------------|--------------------------------------------------------------------------------------------------------------------------------------------------------------------------------------------------------------------------------------------------------------------------|
| Journal:                        | <i>BMJ Open</i>                                                                                                                                                                                                                                                          |
| Manuscript ID                   | bmjopen-2019-029174.R3                                                                                                                                                                                                                                                   |
| Article Type:                   | Communication                                                                                                                                                                                                                                                            |
| Date Submitted by the Author:   | 25-Nov-2019                                                                                                                                                                                                                                                              |
| Complete List of Authors:       | Fowler Davis, Sally; Sheffield Hallam University, Faculty of health and Wellbeing; Sheffield Teaching Hospitals NHS Foundation Trust, CCA Care Group<br>Hinde, Sebastian; York University, Centre for Health Economics<br>Ariss, Steven; University of Sheffield, SchARR |
| <b>Primary Subject Heading</b>: | Health services research                                                                                                                                                                                                                                                 |
| Secondary Subject Heading:      | Communication, Evidence based practice, Health economics, Health policy                                                                                                                                                                                                  |
| Keywords:                       | Evaluation, NHS Vanguard, Healthcare, Integrated care                                                                                                                                                                                                                    |
|                                 |                                                                                                                                                                                                                                                                          |

SCHOLARONE™  
Manuscripts

1  
2  
3 **Title: Complex programme evaluation of a ‘New Care Model’ Vanguard; a shared**  
4 **commitment to quality improvement in an integrated health and care context**  
5  
6

7 Sally Fowler Davis, Sheffield Hallam University [s.fowler-davis@shu.ac.uk](mailto:s.fowler-davis@shu.ac.uk) \*

8 Sebastian Hinde, York Health Economics Centre, York University [sebastian.hinde@york.ac.uk](mailto:sebastian.hinde@york.ac.uk)

9 Steven Ariss, SCHARR, University of Sheffield [s.ariss@sheffield.ac.uk](mailto:s.ariss@sheffield.ac.uk)  
10

- 11
- 12 • **Authors’ Contributions:** SFD drafted the communication with contributions from SH
  - 13 and SA on the content which was based on Vanguard evaluation experience. All
  - 14 authors contributed to the final version and approve the submission.
  - 15 • **Funding statement:** This work was supported by NHS England as a Vanguard
  - 16 evaluation.
  - 17 • **Competing Interests statement.** There are no competing interests
  - 18 • **Keywords;** Healthcare, Evaluation, Integrated care, NHS Vanguard.
  - 19
  - 20

21 \*Correspondence  
22

23  
24 **Abstract:** NHS Vanguards, under-pressure to perform, required better contracting and data  
25 management arrangements with evaluation teams, to ensure that integrated service  
26 outcomes could be reported effectively. This communication reflects the experience of  
27 evaluating an NHS Vanguard and suggests how academic teams can improve capacity for  
28 complex programme evaluation of rapid improvements in integrated services. This should  
29 be based on a shared commitment to data collection and management. Also, robust  
30 knowledge exchange processes can enable systems change and sustainability. The  
31 identifying features of the particular site have been withheld.  
32  
33  
34  
35  
36  
37  
38  
39  
40

#### 41 **Strengths and limitations**

- 42 • The identification of methodological challenges in complex programme evaluation
- 43 • Learning presented from a single Vanguard site
- 44 • Recommendations for improved outcomes and capacity for systems-level evaluation
- 45
- 46
- 47

#### 48 **Background**

49  
50 The closer integration of health care and social care has been a policy goal of successive UK  
51 governments for over 40 years, who in common with most advanced western countries face  
52 the challenge of an ageing population with a range of health and care needs. In 2014/15  
53 NHS England created funding for 50 New Care Model “Vanguard” visions of best practice in  
54 the NHS [1]. The sites were selected on the premise that a number of areas in England  
55 would spearhead the NHS Five Year Forward View [2] and build local quality improvement  
56 leadership capacity. While the funding for the three year projects was from central  
57  
58  
59  
60

1  
2  
3  
4 government, the inspiration for the planning and implementation of each project was based  
5 on local priorities. Stakeholders from the health economy contributed to the plans, with  
6 local decision makers and practitioners, aiming to work together to achieve system-level  
7 improvements [3]. An important objective of the programme was to design new care  
8 models that could be replicated quickly across the NHS. Local implementation [4] was based  
9 on the idea that health communities would know and understand the opportunities for  
10 health improvement and prevention [5] and make a radical step change in systems re-design  
11 [6]. In most cases the funding and accountability arrangements and separate regulatory  
12 regimes focussed on the performance of individual organisations but not the system as a  
13 whole [7].

14  
15  
16  
17  
18  
19 The Vanguard planned three separate service initiatives as 'rapid improvement cycles' over  
20 18 months (the evaluation team was not involved in the first stage). The complexity of the  
21 change was compounded by organisations collaborating without the benefit of shared  
22 governance arrangements. There was a lack of clarity and accountability in decision-making  
23 processes with different tiers of management and some detachment at Board level [8].  
24 Organisational gatekeeping of service-delivery teams and short term contracts for  
25 practitioners made planning for operational delivery very problematic and local clinical  
26 leadership was reduced due to a significant reduction and delayed funding from NHS  
27 England. These factors contributed to slower than planned progress towards integrated  
28 services operating in primary care.

29  
30  
31  
32  
33  
34  
35  
36  
37  
38  
39 The aim of evaluation was to generate an iterative programme theory to explain the  
40 Vanguard improvement activity across a health and care system; to systematically report  
41 system change methods and cost savings. In most cases (nationally) the evaluation methods  
42 included complex, theory-led process evaluations (9, 10, 11,) based around the  
43 commissioning processes and the multidisciplinary teams. Methods also included some  
44 health economic evaluation to retrospectively assess the cost of delivery and the value of  
45 the service, measured against previous service provision. This paper discusses the  
46 retrospective learning from one evaluation process in one NHS Vanguard site.

## 47 48 49 50 51 52 53 54 55 56 **Vanguard Evaluation**

57  
58 Evaluation processes were variously negotiated by each Vanguard site in line with NHS  
59 England guidance on the evaluation design; with the ultimate goal of comparing results and  
60

1  
2  
3 finding across all sites [12]. Programme teams contracted with evaluation teams to enable  
4 the generation of quasi-scientific correlations and testing of generative causal assumptions;  
5 to establish effectiveness of intervention in a 'real-world' context. Some £60 million was  
6 allocated to the evaluations of the 50 Vanguards reporting in March 2018, by which time  
7 NHS England expected individual Vanguards to be sustainable without further national  
8 funding for transformation [13]. They were asked to resist the pressure to provide positive  
9 signs of impact, at the expense of learning [14] but the urgency of the demand for results  
10 grew as the programme progressed.  
11  
12  
13  
14  
15  
16  
17  
18  
19

20 Complex programme evaluation included economic evaluation but also sought to identify a  
21 range of active ingredients and disruptive 'innovations'. Local imperatives were identified  
22 across the health and care economy, for example, re-designing community services (nursing  
23 and allied health professionals) to work closely with general practice and achieve better  
24 patient outcomes. Vanguards came under pressure to report measurable improvements  
25 through generating organisational case study of the changes in practice [15]. The co-design  
26 of the evaluation was therefore an important element of the Vanguard, to enable access to  
27 systematically collected and collated data. This involved describing and explaining the  
28 complex processes and the effects of changes within a primary care system (PACS).  
29  
30  
31  
32  
33  
34  
35  
36  
37

### 38 **Evaluation Processes**

39 The evaluation was registered as a service evaluation with the research office of the  
40 Healthcare Trust and approved by the University Ethics Committee.  
41  
42  
43  
44

45 Utilisation-focused methods [16] aim to meet the demand for the "social-constructivist"  
46 approaches and reflected the needs of implementation processes in healthcare. To  
47 evaluate effectively, there is a need for a full understanding of evaluation's nature, purposes  
48 and concepts [17] and to establish a working relationship and understanding of the  
49 priorities and needs for data and knowledge within the health care provider group. To this  
50 end several qualitative data sets were collected and collated between October 2016 and  
51 November 2017 capturing the views and values of those involved in planning and delivery of  
52 the integrated community service model. The aim was to develop, test and refine a  
53 programme theory that supported implementation [18] allowing managers to identify who  
54  
55  
56  
57  
58  
59  
60

1  
2  
3 the primary end users of the evaluation findings might be; what evidence they require and  
4 how this could be formed into a sustained value proposition across the system.  
5  
6  
7

8  
9 The requirement to implement a local evaluation was a condition of funding the Vanguard.  
10 The evaluation team were brought together because of their experience and willingness to  
11 work with a health system and collaborate in the development of evaluation objectives for  
12 the Vanguard. . Key principles of the evaluation [16, 19] included a commitment to the  
13 usefulness of evaluation evidence [16] and the development of effective, trusting  
14 relationships with the key stakeholders [19]. It can take time for service providers to shift  
15 towards collaborative working and finding equilibrium on the trust/control nexus (at  
16 individual and organisational levels [20, 21]). Similar findings have emerged from other  
17 NHSE national innovation programmes; demonstrating the time required developing  
18 effective working relationships in complex evaluation situations, (seeing NHSE Healthcare  
19 Technologies Testbed Programme [22]).  
20  
21  
22  
23  
24  
25  
26  
27  
28  
29

30  
31 In this case, the relationship between Vanguard and evaluation team did not develop as  
32 hoped. Whilst every attempt was made to access staff, patients and all available data, as is  
33 usually the case with implementation evaluation, there was limited capacity to use the  
34 findings in planning for Vanguard activity. Rapid improvement cycles were planned without  
35 use of the interim evaluation report data and without sufficient notice to coordinate  
36 evaluation findings with decision-making requirements. The evaluation team employed an  
37 'embedded' evaluator to access and present data but the approach achieved limited success  
38 partly due to a lack of organisational capacity to generate patient outcome data and  
39 organise new working processes. There were continual requests for formal changes to  
40 contractual arrangements. Evaluation teams require knowledge- exchange with the  
41 Vanguard to enable the prioritisation of data collection. The continuous improved use of  
42 local knowledge and research evidence; enabling the analysis and reporting of service  
43 outcomes.  
44  
45  
46  
47  
48  
49  
50  
51  
52  
53  
54

#### 55 56 **Difficulties with Data**

57  
58 Evaluation involves a shared commitment to the normalisation of data collection,  
59 visualisation and analysis, shared between partners. The Vanguard, working closely to the  
60



1  
2  
3 specification of NHS England sought to meet data required by the national programme that  
4 demonstrated rapid, large-scale changes in process-performance indicators at a system-  
5 level, i.e. reduction in attendances at Emergency Departments. This was at the expense of  
6 data collection and analysis that could be used for operational planning. Key stakeholders  
7 were unable to agree on a set of outcome metrics that best reflected population health and  
8 fitted with the programme theories of change. The failure to discriminate between the  
9 different levels of data need for a service transformation can result in a constant 'flux' or  
10 extreme change. In this case it proved to make implementation too difficult and  
11 contributed to the premature closure of interventions.  
12  
13  
14  
15  
16  
17  
18  
19  
20

21 Qualitative data provided an important early insight into the adoption of new processes and  
22 systems at service level for example, one member of the 'Vanguard Delivery Board'  
23 contributed through in-depth interviews;  
24  
25  
26  
27  
28

29 *"We've got a cross-organisational group that comes together. So we do share all of those*  
30 *metrics. But a lot of them they're quite complicated. ...So one of the ones that were shared*  
31 *with us was around... the percentage of beds where people are in them who could*  
32 *potentially be somewhere else. But the definition that's used wouldn't be the definition, for*  
33 *me getting that headline data is great, but once you start querying that data you realise that*  
34 *your understanding of what that means isn't actually what's being collected. ... So it's that*  
35 *understanding of each other's organisation, and what those metrics mean, not actually*  
36 *making assumptions based on what you think things mean". (Vanguard Stakeholder).*  
37  
38  
39  
40  
41  
42  
43  
44

45 Data collection and management needed to be strategically focused on consistent  
46 interventions that could be evaluated effectively. In this particular case, the lack of capacity  
47 in front-line teams, to identify and consistently collect population outcomes data meant  
48 that Vanguard metrics did not reflect the additional benefit of the integrated service to  
49 patients. In many cases the metrics that were being collected were not fit for purpose and  
50 failed to show how health outcomes were being achieved.  
51  
52  
53  
54  
55  
56  
57

58 The critical challenge of building capacity to collect and collate data and use it analytically to  
59 inform commissioning decisions, was central to deliver future services. Data needed to be  
60

1  
2  
3 accessible to stakeholders, paper-free at the point of care and connected to other services  
4 and systems [23]. However, many Vikings have been slow to collect and collate anything  
5 other than service level data. Population health outcomes remain elusive, in spite of the  
6 original commitment, to showing the impact that changes would have on patients, staff and  
7 the wider population.  
8  
9  
10  
11  
12

### 13 14 **Representing the Return on Investment**

15  
16 A mixed method economic evaluation aligned to the national requirements started with the  
17 broad remit of exploring the costs and health related impact of the new model of care,  
18 compared to current practice. However, in common with a number of other Vikings  
19 [24], challenges in accessing meaningful patient outcome data within and a time-limited  
20 period with repeated rapid redesigns significantly hampered the analysis.  
21  
22  
23  
24  
25

26  
27 The economic evaluation considered the cost of the Viking programme alongside a time  
28 series analysis of secondary care (hospital) activity (e.g. emergency bed days, length of stay  
29 and admissions). It demonstrated that there was no observed impact, negative or positive,  
30 that could be directly associated with the service re-design over the time period analysed.  
31 The insufficient evidence of a return on investment was the only element of the evaluation  
32 that the programme team used to inform the on-going commissioning decisions,  
33 unfortunately leading to a dis-continuation of the integrated team. The inability to offset  
34 the cost of service provision and no evidence of improvement on patient health meant that  
35 the Viking was unable to continue beyond the programme period.  
36  
37  
38  
39  
40  
41  
42  
43

44  
45 The economic evaluation, sought a comparator site using a synthetic comparator [25] a  
46 sample area, assessing secondary care costs in an attempt to show short term benefit. The  
47 intervention was defined as integrated community services and the causality of the effect of  
48 the integrated team needed to be disentangled from other common causes of variation  
49 such as winter flu or work-force changes. A good understanding of the systems influences  
50 are critical to programme evaluations [26] but this requires considerable embedded  
51 knowledge and understanding to be shared across the programme and evaluation teams.  
52  
53  
54  
55  
56  
57  
58  
59  
60

1  
2  
3 The true cost of the intervention is an important element of the economic analysis [26]. In  
4 many of the Vanguard programmes, the funding of the service was made up of a  
5 combination of central funding a locally provided in-kind provision and the implications are  
6 important for the evaluation. For example, the redeployment of staff to the new  
7 programme is typically very challenging to quantify, even in the short term. Other factors  
8 included; the incremental cost of the new service; the additional national funding and  
9 critically the ability of the programme management team to understand and confirm the  
10 costs. The marginal cost of funding the programme long-term, with many of the in-kind  
11 services being provided alongside activities may not be sustainable on a permanent basis.  
12  
13  
14  
15  
16  
17  
18  
19  
20  
21

### 22 Workforce Challenges

23 Short term workforce changes i.e. through secondments and short term appointments go to  
24 the heart of the sustainability of what the programme is going to achieve. The National  
25 Audit Office have recently recognised that there were 'missed opportunities' [13] for the  
26 required depth and scale of transformation across the system, particularly in relation to the  
27 delivery that achieved economic sustainability and full value for money of the programme.  
28 Service outcomes related to existing staff in short term posts and variation in hospital  
29 activity was unlikely to be a good indicator of the benefits achieved through integrated team  
30 practice and the long term patient health and wellbeing.  
31  
32  
33  
34  
35  
36  
37  
38  
39

40 While ideally any evaluation would incorporate a life-time consideration of the health of the  
41 patient, and other relevant social outcomes [27] such time-intensive research was clearly  
42 not possible in the Vanguard. One insight was fed back to reflect the way that individual  
43 practitioners approached team practices;  
44  
45  
46  
47  
48

49 *"..... I think it's quite difficult for individual organisations to let go of control. So whilst I think*  
50 *at the moment we've got people working in an integrated office, so out of one office, I*  
51 *wouldn't yet say we've managed to get an integrated team. ....we're on that journey, and*  
52 *we are working towards becoming one team. But culturally and how everybody works, and*  
53 *how all the different organisations work, and what that looks like is quite difficult.*

54  
55  
56  
57  
58 *(Vanguard Stakeholder)*  
59  
60

## Improving capacity for complex programme evaluation

Taking the knowledge and experience into account, this reflection identifies four initial areas for improvement in the planning for academic evaluation. The purpose is to improve reporting on policy-driven transformation programmes.

**Increase access to integrated services:** Evaluation teams require specific access to managers and the interdisciplinary workforce [28]. Consensus on General Practitioners' views and perceptions of the systems change are required to identify the variation in choices and priorities for integrated working [20]. Interdisciplinary working remains underdeveloped in primary care and evaluation could highlight good practice, for example enabling the most effective local improvements, based on those designed to provide rapid access [29]. Clinical leadership is often under considerable operational pressure to demonstrate success of the integration of professional practices [30]. So, a commitment to allowing patient-facing teams to share experience and express priorities for integration is a core evaluation requirement. The use of qualitative data to represent 'telling cases' is critical to show how systems leadership has led to greater integration.

**Develop contractual arrangements:** Evaluations designed to inform innovations in service delivery, need pre-established stages and clear reporting requirements. Whilst evaluations can be rapid-cycle and feedback can be informal in nature, there is a requirement to maintain a timetable of activities within a relatively stable service delivery model, to allow for setting up data collection processes and to analyse and interpret these data. The evaluation team is often able to become an additional resource through the sharing of research evidence and comparative experience from other health context. This model of evaluation practice needs to be introduced and contracted carefully, in such a way as to make clear the purpose and value of the partnership, of site visits and observations [31]. Evaluation planning should include opportunities for organisational development through engaging community and professional stakeholders and formative and summative evaluation [23].

1  
2  
3 **Economic evaluation:** Evaluation teams require programme leaders to co-design the model  
4 of health economics recognising not only the return on investment but the value of the  
5 learning and leadership within the system. The increasing value on social justice in  
6 economic terms is a significant test of the local commitment to the cost and return on  
7 sustained organisational learning [32]. Shared understandings of the metrics by which  
8 population health improvements are being assessed are now critical. They serve to  
9 challenge assumptions that secondary care metrics, i.e. emergency admission data, is  
10 satisfactory. The design of the economic evaluation needs to reflect the original values  
11 associated with the shared quality improvement goal which in this case had three facets;  
12 improving care, managing demand and reducing hospital admissions. The attempt to  
13 identify value and attribute costs at systems level is required before integrated care services  
14 can be sustainably commissioned [29].  
15  
16  
17  
18  
19  
20  
21  
22  
23  
24  
25  
26

27 **Building capacity for evidence-based change:** Complex evaluation seeks to deliver the  
28 support for decision-making for services in 'practice-based' commissioning [33] and NHS  
29 England supported Vanguard sites to investigate their concerns about the level of unplanned  
30 admissions. A range of interventions could be effective in reducing these [34], with a view  
31 to re-designing care and promoting health improvement. Routinely collected metrics may  
32 be used to assess the quality and effectiveness of care provision and the choice of metric  
33 needs to be a careful consideration in relation to quality and cost impact. Vanguard  
34 evaluation enables an evidence-based approach to improvement but just as health  
35 professionals need a full understanding of the conditions they have to treat, academics  
36 undertaking evaluation need as full an understanding of the process as possible [35]. The  
37 engagement with the particular health system and a commitment to share the findings with  
38 stakeholders requires time and capacity to achieve the best outcomes for selected patient  
39 populations [36].  
40  
41  
42  
43  
44  
45  
46  
47  
48  
49  
50  
51

## 52 **Conclusion**

53  
54 Complex programme evaluation was a requirement of each NHS Vanguard sites, designed  
55 relative to the local improvements that were planned with services and across health and  
56 care systems. An academic team was recruited to increase capacity, insight and report  
57 findings of a local systems transformation. Improved evaluation processes may be needed  
58  
59  
60

1  
2  
3 to showcase the value of the investment in 'new ways of working' and to sustain system  
4 outputs. Better evaluation outcomes would be achieved with a) increased access to the  
5 frontline services and the process of integration b) contractual processes that enable  
6 evaluation teams to share interim findings and engage with complex dilemmas across the  
7 system c) clarification on a range of quality outcome metrics that would inform an economic  
8 evaluation thus helping commissioning to resist the considerable pressure to view short  
9 term cost savings and d) capacity building associated with the relevant research evidence to  
10 support local planning. National evaluation is currently being undertaken to identify the  
11 sustained changes that have taken place.  
12  
13  
14  
15  
16  
17  
18  
19  
20

21 *Words- 2987 excluding abstract*  
22  
23

### 24 **Acknowledgement**

25  
26 The research was funded by the NIHR CLAHRC Yorkshire and Humber. [www.clahrc-yh.nihr.ac.uk](http://www.clahrc-yh.nihr.ac.uk).  
27  
28

29  
30 The views expressed are those of the author(s), and not necessarily those of the NIHR or the Department of  
31 Health and Social Care.  
32  
33

### 34 **Full references**

- 35  
36  
37 1. England, N. H. S. (2016). New care models: Vanguard—developing a blueprint for the  
38 future of NHS and care services. *London: NHS England*.  
39  
40 2. NHS England (2014) Five Year Forward View [https://www.england.nhs.uk/wp-](https://www.england.nhs.uk/wp-content/uploads/2014/10/5yfv-web.pdf)  
41 [content/uploads/2014/10/5yfv-web.pdf](https://www.england.nhs.uk/wp-content/uploads/2014/10/5yfv-web.pdf) (last accessed 10.4.19)  
42  
43 3. England, N. H. S. New care models: Vanguard—developing a blueprint for the future of  
44 NHS and care services; 2016.  
45  
46 4. England, N. H. S. (2015). New care models—vanguard sites. London: NHS England.  
47 Available online at [www.england.nhs.uk/ourwork/futurenhs/5yfv-ch3/new-care-](http://www.england.nhs.uk/ourwork/futurenhs/5yfv-ch3/new-care-models/)  
48 [models/](http://www.england.nhs.uk/ourwork/futurenhs/5yfv-ch3/new-care-models/)[Accessed 11 December 2015].  
49  
50 5. Humphries, R. (2015). Integrated health and social care in England—Progress and  
51 prospects. *Health Policy*, 119(7), 856-859.  
52  
53 6. Iacobucci, G. (2015). NHS England announces 29 sites to spearhead integrated care  
54 models. *BMJ: British Medical Journal (Online)*, 350.  
55  
56 7. Iacobucci G. NHS plan calls for new models of care and greater emphasis on prevention.  
57 *BMJ* 2014;349:g6430. [www.bmj.com/content/349/bmj.g6430](http://www.bmj.com/content/349/bmj.g6430).  
58  
59  
60

- 1
  - 2
  - 3
  - 4
  - 5
  - 6
  - 7
  - 8
  - 9
  - 10
  - 11
  - 12
  - 13
  - 14
  - 15
  - 16
  - 17
  - 18
  - 19
  - 20
  - 21
  - 22
  - 23
  - 24
  - 25
  - 26
  - 27
  - 28
  - 29
  - 30
  - 31
  - 32
  - 33
  - 34
  - 35
  - 36
  - 37
  - 38
  - 39
  - 40
  - 41
  - 42
  - 43
  - 44
  - 45
  - 46
  - 47
  - 48
  - 49
  - 50
  - 51
  - 52
  - 53
  - 54
  - 55
  - 56
  - 57
  - 58
  - 59
  - 60
8. Jones, L., Pomeroy, L., Robert, G., Burnett, S., Anderson, J. E., Morris, S., ... & Fulop, N. J. (2019). Explaining organisational responses to a board-level quality improvement intervention: findings from an evaluation in six providers in the English National Health Service. *BMJ Qual Saf*, 28(3), 198-204.
9. Craig, P., Dieppe, P., Macintyre, S., Michie, S., Nazareth, I., & Petticrew, M. (2008). Developing and evaluating complex interventions: the new Medical Research Council guidance. *Bmj*, 337, a1655.
10. Craig, P., Dieppe, P., Macintyre, S., Michie, S., Nazareth, I., & Petticrew, M. (2013). Developing and evaluating complex interventions: the new Medical Research Council guidance *International Journal of Nursing Studies* 50 ( 5) 587-592
11. Moore, G. et al (2015) Process evaluation of complex interventions: Medical Research Council guidance. *Bmj* 2015;350
12. NHS England (2016) New Care Models, Strategy for Evaluation for new care model vanguards <https://www.england.nhs.uk/wp-content/uploads/2015/07/ncm-evaluation-strategy-may-2016.pdf> (last accessed 10.4.2019)
13. National Audit Office (2018) Developing new care models through NHS vanguards <https://www.nao.org.uk/report/developing-new-care-models-through-nhs-vanguards/> (last accessed 10.4.19)
14. Freeman L, Hinks S (2018) At the forefront of evaluating complex system change: NHS England's approach, Operational Research and Evaluation Unit | Analytical Services NHS England [http://the-sra.org.uk/wp-content/uploads/freeman\\_and\\_hinks.pdf](http://the-sra.org.uk/wp-content/uploads/freeman_and_hinks.pdf) (last accessed 10.4.19)
15. Naylor, C., Charles, A. (2018). Developing new models of care in the PACS vanguards. London: King's Fund.
16. Patton, M. Q. (2018). *Facilitating evaluation: Principles in practice*. Sage.
17. McCoy, M., & Hargie, O. D. (2001). Evaluating evaluation: implications for assessing quality. *International Journal of Health Care Quality Assurance*, 14(7), 317-327.
18. Patton, M. Q. (2013). The roots of utilization-focused evaluation. *Evaluation roots: a wider perspective of theorists*, 293-97.
19. Patton MQ. Principles-focused evaluation: The guide. Guilford Publications; 2017 Oct 3.
20. Fowler Davis, S., Piercy, H., Pearson, S., Thomas, B., & Kelly, S. (2018). Factors affecting decisions to extend access to primary care: results of a qualitative evaluation of general practitioners' views. *BMJ open*, 8(3), e019084.
21. Varoutsas E, Scapens RW. Trust and control in evolving inter-organisational relationships: Evidence from the aerospace industry. *Accounting, Auditing & Accountability Journal*. 2018 Jan 15;31(1):112-40.
22. Ariss S, Perfect Patient Pathway Evaluation Report for NHS England TestBed Programme <https://www.england.nhs.uk/ourwork/innovation/test-beds/first-wave-of-test-beds/> (last accessed 6.5.19)

- 1  
2  
3 23. Miller, R., Weir, C., & Gulati, S. (2018). Transforming primary care: scoping review of  
4 research and practice. *Journal of Integrated Care*.
- 5  
6 24. McCarthy, Grey and McMeekin, 'Economic Evaluation of New Models of Care: "Quick  
7 Wins" or Robust Methods' HESG Winter 2019 conference, 7th January 2019
- 8  
9 25. Kreif N, Grieve R, Hangartner D, Turner AJ, Nikolova S, Sutton M. Examination of the  
10 synthetic control method for evaluating health policies with multiple treated units. *Health*  
11 *economics*. 2016 Dec;25(12):1514-28.
- 12  
13 26. Aceijas C Assessing Evidence to improve Population Health and Wellbeing-  
14 Transforming Public Health Practice Learning Matters (2011)
- 15  
16 27. Drummond MF, Sculpher MJ, Claxton K, Stoddart GL, Torrance GW. Methods for the  
17 economic evaluation of health care programmes. Oxford university press; 2015 Sep 25.
- 18  
19 28. Nancarrow, S. A., Booth, A., Ariss, S., Smith, T., Enderby, P., & Roots, A. (2013). Ten  
20 principles of good interdisciplinary team work. *Human resources for Health*, 11(1), 19.
- 21  
22 29. Bodenheimer, T., Ghorob, A., Willard-Grace, R., & Grumbach, K. (2014). The 10  
23 building blocks of high-performing primary care. *The Annals of Family Medicine*, 12(2),  
24 166-171.
- 25  
26 30. Smith, T., Fowler-Davis, S., Nancarrow, S., Ariss, S. M. B., & Enderby, P. (2018).  
27 Leadership in interprofessional health and social care teams: a literature review. *Leadership*  
28 *in Health Services*.
- 29  
30 31. Chapman H, M, Murphy NF, Patton MQ (2017) A guiding typography for site visits in  
31 R.K. Nelson & D.L Roseland (Eds) *Conducting and Using Evaluative Site Visits*, New  
32 Directions for Evaluation 156, 11-19
- 33  
34 32. Dukhanin, V., Searle, A., Zwerling, A., Dowdy, D. W., Taylor, H. A., & Merritt, M. W.  
35 (2018). Integrating social justice concerns into economic evaluation for healthcare and public  
36 health: A systematic review. *Social Science & Medicine*, 198, 27-35.
- 37  
38 33. Smith, J., Dixon, J., Mays, N., McLeod, H., Goodwin, N., McClelland, S., ... & Wyke, S.  
39 (2005). The NHS revolution: health care in the market place: Practice based commissioning:  
40 applying the research evidence. *BMJ: British Medical Journal*, 331(7529), 1397.
- 41  
42 34. Purdy S, Paranjothy S, Huntley A, et al. Interventions to reduce unplanned hospital  
43 admission: a series of systematic reviews. Jun 2012.
- 44  
45 35. McCoy, M., & Hargie, O. D. (2001). Evaluating evaluation: implications for assessing  
46 quality. *International Journal of Health Care Quality Assurance*, 14(7), 317-327.
- 47  
48 36. Bardsley M, Steventon A, Smith J, Dixon J; Nuffield Trust. Evaluating integrated and  
49 community-based care: how do we know what works? Jun 2013
- 50  
51  
52  
53  
54  
55  
56  
57  
58  
59  
60



# BMJ Open

## Complex programme evaluation of a 'New Care Model' Vanguard; a shared commitment to quality improvement in an integrated health and care context

|                                 |                                                                                                                                                                                                                                                                          |
|---------------------------------|--------------------------------------------------------------------------------------------------------------------------------------------------------------------------------------------------------------------------------------------------------------------------|
| Journal:                        | <i>BMJ Open</i>                                                                                                                                                                                                                                                          |
| Manuscript ID                   | bmjopen-2019-029174.R4                                                                                                                                                                                                                                                   |
| Article Type:                   | Communication                                                                                                                                                                                                                                                            |
| Date Submitted by the Author:   | 09-Dec-2019                                                                                                                                                                                                                                                              |
| Complete List of Authors:       | Fowler Davis, Sally; Sheffield Hallam University, Faculty of health and Wellbeing; Sheffield Teaching Hospitals NHS Foundation Trust, CCA Care Group<br>Hinde, Sebastian; York University, Centre for Health Economics<br>Ariss, Steven; University of Sheffield, SchARR |
| <b>Primary Subject Heading</b>: | Health services research                                                                                                                                                                                                                                                 |
| Secondary Subject Heading:      | Communication, Evidence based practice, Health economics, Health policy                                                                                                                                                                                                  |
| Keywords:                       | Evaluation, NHS Vanguard, Healthcare, Integrated care                                                                                                                                                                                                                    |
|                                 |                                                                                                                                                                                                                                                                          |

SCHOLARONE™  
Manuscripts

1  
2  
3 **Title: Complex programme evaluation of a ‘New Care Model’ Vanguard; a shared**  
4 **commitment to quality improvement in an integrated health and care context**  
5  
6

7 Sally Fowler Davis, Sheffield Hallam University [s.fowler-davis@shu.ac.uk](mailto:s.fowler-davis@shu.ac.uk) \*

8 Sebastian Hinde, York Health Economics Centre, York University [sebastian.hinde@york.ac.uk](mailto:sebastian.hinde@york.ac.uk)

9 Steven Ariss, SchARR, University of Sheffield [s.ariss@sheffield.ac.uk](mailto:s.ariss@sheffield.ac.uk)  
10

- 11
- 12 • **Authors’ Contributions:** SFD drafted the communication with contributions from SH  
13 and SA on the content which was based on Vanguard evaluation experience. All  
14 authors contributed to the final version and approve the submission.
  - 15 • **Funding statement:** This work was supported by NHS England as a Vanguard  
16 evaluation.
  - 17 • **Competing Interests statement.** There are no competing interests
  - 18 • **Keywords;** Healthcare, Evaluation, Integrated care, NHS Vanguard.  
19  
20

21 \*Correspondence  
22

23  
24 **Abstract:** NHS Vanguards, under-pressure to perform, required better contracting and data  
25 management arrangements with evaluation teams, to ensure that integrated service  
26 outcomes could be reported effectively. This communication reflects the experience of  
27 evaluating an NHS Vanguard and suggests how academic teams can improve capacity for  
28 complex programme evaluation of rapid improvements in integrated services. This should  
29 be based on a shared commitment to data collection and management. Also, robust  
30 knowledge exchange processes can enable systems change and sustainability. The  
31 identifying features of the particular site have been withheld.  
32  
33  
34  
35  
36  
37  
38  
39  
40

#### 41 **Strengths and limitations**

- 42 • The identification of methodological challenges in complex programme evaluation
- 43 • Learning presented from a single Vanguard site
- 44 • Recommendations for improved outcomes and capacity for systems-level evaluation  
45  
46  
47

#### 48 **Background**

49  
50 The closer integration of health care and social care has been a policy goal of successive UK  
51 governments for over 40 years, who in common with most advanced western countries face  
52 the challenge of an ageing population with a range of health and care needs. In 2014/15  
53 NHS England created funding for 50 New Care Model “Vanguard” visions of best practice in  
54 the NHS [1]. The sites were selected on the premise that a number of areas in England  
55 would spearhead the NHS Five Year Forward View [2] and build local quality improvement  
56 leadership capacity. While the funding for the three year projects was from central  
57  
58  
59  
60

1  
2  
3  
4 government, the inspiration for the planning and implementation of each project was based  
5 on local priorities. Stakeholders from the health economy contributed to the plans, with  
6 local decision makers and practitioners, aiming to work together to achieve system-level  
7 improvements [3]. An important objective of the programme was to design new care  
8 models that could be replicated quickly across the NHS. Local implementation [4] was based  
9 on the idea that health communities would know and understand the opportunities for  
10 health improvement and prevention [5] and make a radical step change in systems re-design  
11 [6]. In most cases the funding and accountability arrangements and separate regulatory  
12 regimes focussed on the performance of individual organisations but not the system as a  
13 whole [7].

14  
15  
16  
17  
18  
19 The Vanguard planned three separate service initiatives as 'rapid improvement cycles' over  
20 18 months (the evaluation team was not involved in the first stage). The complexity of the  
21 change was compounded by organisations collaborating without the benefit of shared  
22 governance arrangements. There was a lack of clarity and accountability in decision-making  
23 processes with different tiers of management and some detachment at Board level [8].  
24 Organisational gatekeeping of service-delivery teams and short term contracts for  
25 practitioners made planning for operational delivery very problematic and local clinical  
26 leadership was reduced due to a significant reduction and delayed funding from NHS  
27 England. These factors contributed to slower than planned progress towards integrated  
28 services operating in primary care.

29  
30  
31  
32  
33  
34  
35  
36  
37  
38  
39 The aim of evaluation was to generate an iterative programme theory to explain the  
40 Vanguard improvement activity across a health and care system; to systematically report  
41 system change methods and cost savings. In most cases (nationally) the evaluation methods  
42 included complex, theory-led process evaluations (9, 10, 11,) based around the  
43 commissioning processes and the multidisciplinary teams. Methods also included some  
44 health economic evaluation to retrospectively assess the cost of delivery and the value of  
45 the service, measured against previous service provision. This paper discusses the  
46 retrospective learning from one evaluation process in one NHS Vanguard site.

## 47 48 49 50 51 52 53 54 55 56 **Vanguard Evaluation**

57  
58 Evaluation processes were variously negotiated by each Vanguard site in line with NHS  
59 England guidance on the evaluation design; with the ultimate goal of comparing results and  
60

1  
2  
3 finding across all sites [12]. Programme teams contracted with evaluation teams to enable  
4 the generation of quasi-scientific correlations and testing of generative causal assumptions;  
5 to establish effectiveness of intervention in a 'real-world' context. Some £60 million was  
6 allocated to the evaluations of the 50 Vanguards reporting in March 2018, by which time  
7 NHS England expected individual Vanguards to be sustainable without further national  
8 funding for transformation [13]. They were asked to resist the pressure to provide positive  
9 signs of impact, at the expense of learning [14] but the urgency of the demand for results  
10 grew as the programme progressed.  
11  
12  
13  
14  
15  
16  
17  
18  
19

20 Complex programme evaluation included economic evaluation but also sought to identify a  
21 range of active ingredients and disruptive 'innovations'. Local imperatives were identified  
22 across the health and care economy, for example, re-designing community services (nursing  
23 and allied health professionals) to work closely with general practice and achieve better  
24 patient outcomes. Vanguards came under pressure to report measurable improvements  
25 through generating organisational case study of the changes in practice [15]. The co-design  
26 of the evaluation was therefore an important element of the Vanguard, to enable access to  
27 systematically collected and collated data. This involved describing and explaining the  
28 complex processes and the effects of changes within a primary care system (PACS).  
29  
30  
31  
32  
33  
34  
35  
36  
37

### 38 **Evaluation Processes**

39 The evaluation was registered as a service evaluation with the research office of the  
40 Healthcare Trust and approved by the University Ethics Committee.  
41  
42  
43  
44

45 Utilisation-focused methods [16] aim to meet the demand for the "social-constructivist"  
46 approaches and reflected the needs of implementation processes in healthcare. To  
47 evaluate effectively, there is a need for a full understanding of evaluation's nature, purposes  
48 and concepts [17] and to establish a working relationship and understanding of the  
49 priorities and needs for data and knowledge within the health care provider group. To this  
50 end several qualitative data sets were collected and collated between October 2016 and  
51 November 2017 capturing the views and values of those involved in planning and delivery of  
52 the integrated community service model. The aim was to develop, test and refine a  
53 programme theory that supported implementation [18] allowing managers to identify who  
54  
55  
56  
57  
58  
59  
60

1  
2  
3 the primary end users of the evaluation findings might be; what evidence they require and  
4 how this could be formed into a sustained value proposition across the system.  
5  
6  
7

8  
9 The requirement to implement a local evaluation was a condition of funding the Vanguard.  
10 The evaluation team were brought together because of their experience and willingness to  
11 work with a health system and collaborate in the development of evaluation objectives for  
12 the Vanguard. . Key principles of the evaluation [16, 19] included a commitment to the  
13 usefulness of evaluation evidence [16] and the development of effective, trusting  
14 relationships with the key stakeholders [19]. It can take time for service providers to shift  
15 towards collaborative working and finding equilibrium on the trust/control nexus (at  
16 individual and organisational levels [20, 21]). Similar findings have emerged from other  
17 NHSE national innovation programmes; demonstrating the time required developing  
18 effective working relationships in complex evaluation situations, (seeing NHSE Healthcare  
19 Technologies Testbed Programme [22]).  
20  
21  
22  
23  
24  
25  
26  
27  
28  
29

30  
31 In this case, the relationship between Vanguard and evaluation team did not develop as  
32 hoped. Whilst every attempt was made to access staff, patients and all available data, as is  
33 usually the case with implementation evaluation, there was limited capacity to use the  
34 findings in planning for Vanguard activity. Rapid improvement cycles were planned without  
35 use of the interim evaluation report data and without sufficient notice to coordinate  
36 evaluation findings with decision-making requirements. The evaluation team employed an  
37 'embedded' evaluator to access and present data but the approach achieved limited success  
38 partly due to a lack of organisational capacity to generate patient outcome data and  
39 organise new working processes. There were continual requests for formal changes to  
40 contractual arrangements. Evaluation teams require knowledge- exchange with the  
41 Vanguard to enable the prioritisation of data collection. The continuous improved use of  
42 local knowledge and research evidence; enabling the analysis and reporting of service  
43 outcomes.  
44  
45  
46  
47  
48  
49  
50  
51  
52  
53  
54

#### 55 56 **Difficulties with Data**

57  
58 Evaluation involves a shared commitment to the normalisation of data collection,  
59 visualisation and analysis, shared between partners. The Vanguard, working closely to the  
60

1  
2  
3 specification of NHS England sought to meet data required by the national programme that  
4 demonstrated rapid, large-scale changes in process-performance indicators at a system-  
5 level, i.e. reduction in attendances at Emergency Departments. This was at the expense of  
6 data collection and analysis that could be used for operational planning. Key stakeholders  
7 were unable to agree on a set of outcome metrics that best reflected population health and  
8 fitted with the programme theories of change. The failure to discriminate between the  
9 different levels of data need for a service transformation can result in a constant 'flux' or  
10 extreme change. In this case it proved to make implementation too difficult and  
11 contributed to the premature closure of interventions.  
12  
13  
14  
15  
16  
17  
18  
19  
20

21 Qualitative data provided an important early insight into the adoption of new processes and  
22 systems at service level for example, one member of the 'Vanguard Delivery Board'  
23 contributed through in-depth interviews;  
24  
25  
26  
27  
28

29 *"We've got a cross-organisational group that comes together. So we do share all of those*  
30 *metrics. But a lot of them they're quite complicated. ...So one of the ones that were shared*  
31 *with us was around... the percentage of beds where people are in them who could*  
32 *potentially be somewhere else. But the definition that's used wouldn't be the definition, for*  
33 *me getting that headline data is great, but once you start querying that data you realise that*  
34 *your understanding of what that means isn't actually what's being collected. ... So it's that*  
35 *understanding of each other's organisation, and what those metrics mean, not actually*  
36 *making assumptions based on what you think things mean". (Vanguard Stakeholder).*  
37  
38  
39  
40  
41  
42  
43  
44

45 Data collection and management needed to be strategically focused on consistent  
46 interventions that could be evaluated effectively. In this particular case, the lack of capacity  
47 in front-line teams, to identify and consistently collect population outcomes data meant  
48 that Vanguard metrics did not reflect the additional benefit of the integrated service to  
49 patients. In many cases the metrics that were being collected were not fit for purpose and  
50 failed to show how health outcomes were being achieved.  
51  
52  
53  
54  
55  
56  
57

58 The critical challenge of building capacity to collect and collate data and use it analytically to  
59 inform commissioning decisions, was central to deliver future services. Data needed to be  
60

1  
2  
3 accessible to stakeholders, paper-free at the point of care and connected to other services  
4 and systems [23]. However, many Vikings have been slow to collect and collate anything  
5 other than service level data. Population health outcomes remain elusive, in spite of the  
6 original commitment, to showing the impact that changes would have on patients, staff and  
7 the wider population.  
8  
9  
10  
11  
12

### 13 14 **Representing the Return on Investment**

15  
16 A mixed method economic evaluation aligned to the national requirements started with the  
17 broad remit of exploring the costs and health related impact of the new model of care,  
18 compared to current practice. However, in common with a number of other Vikings  
19 [24], challenges in accessing meaningful patient outcome data within and a time-limited  
20 period with repeated rapid redesigns significantly hampered the analysis.  
21  
22  
23  
24  
25

26  
27 The economic evaluation considered the cost of the Viking programme alongside a time  
28 series analysis of secondary care (hospital) activity (e.g. emergency bed days, length of stay  
29 and admissions). It demonstrated that there was no observed impact, negative or positive,  
30 that could be directly associated with the service re-design over the time period analysed.  
31 The insufficient evidence of a return on investment was the only element of the evaluation  
32 that the programme team used to inform the on-going commissioning decisions,  
33 unfortunately leading to a dis-continuation of the integrated team. The inability to offset  
34 the cost of service provision and no evidence of improvement on patient health meant that  
35 the Viking was unable to continue beyond the programme period.  
36  
37  
38  
39  
40  
41  
42  
43

44  
45 The economic evaluation, sought a comparator site using a synthetic comparator [25] a  
46 sample area, assessing secondary care costs in an attempt to show short term benefit. The  
47 intervention was defined as integrated community services and the causality of the effect of  
48 the integrated team needed to be disentangled from other common causes of variation  
49 such as winter flu or work-force changes. A good understanding of the systems influences  
50 are critical to programme evaluations [26] but this requires considerable embedded  
51 knowledge and understanding to be shared across the programme and evaluation teams.  
52  
53  
54  
55  
56  
57  
58  
59  
60

1  
2  
3 The true cost of the intervention is an important element of the economic analysis [26]. In  
4 many of the Vanguard programmes, the funding of the service was made up of a  
5 combination of central funding a locally provided in-kind provision and the implications are  
6 important for the evaluation. For example, the redeployment of staff to the new  
7 programme is typically very challenging to quantify, even in the short term. Other factors  
8 included; the incremental cost of the new service; the additional national funding and  
9 critically the ability of the programme management team to understand and confirm the  
10 costs. The marginal cost of funding the programme long-term, with many of the in-kind  
11 services being provided alongside activities may not be sustainable on a permanent basis.  
12  
13  
14  
15  
16  
17  
18  
19  
20  
21

### 22 Workforce Challenges

23 Short term workforce changes i.e. through secondments and short term appointments go to  
24 the heart of the sustainability of what the programme is going to achieve. The National  
25 Audit Office have recently recognised that there were 'missed opportunities' [13] for the  
26 required depth and scale of transformation across the system, particularly in relation to the  
27 delivery that achieved economic sustainability and full value for money of the programme.  
28 Service outcomes related to existing staff in short term posts and variation in hospital  
29 activity was unlikely to be a good indicator of the benefits achieved through integrated team  
30 practice and the long term patient health and wellbeing.  
31  
32  
33  
34  
35  
36  
37  
38  
39

40 While ideally any evaluation would incorporate a life-time consideration of the health of the  
41 patient, and other relevant social outcomes [27] such time-intensive research was clearly  
42 not possible in the Vanguard. One insight was fed back to reflect the way that individual  
43 practitioners approached team practices;  
44  
45  
46  
47  
48

49 *"..... I think it's quite difficult for individual organisations to let go of control. So whilst I think*  
50 *at the moment we've got people working in an integrated office, so out of one office, I*  
51 *wouldn't yet say we've managed to get an integrated team. ....we're on that journey, and*  
52 *we are working towards becoming one team. But culturally and how everybody works, and*  
53 *how all the different organisations work, and what that looks like is quite difficult.*  
54  
55  
56  
57

58 *(Vanguard Stakeholder)*  
59  
60



## Improving capacity for complex programme evaluation

Taking the knowledge and experience into account, this reflection identifies four initial areas for improvement in the planning for academic evaluation. The purpose is to improve reporting on policy-driven transformation programmes.

**Increase access to integrated services:** Evaluation teams require specific access to managers and the interdisciplinary workforce [28]. Consensus on General Practitioners' views and perceptions of the systems change are required to identify the variation in choices and priorities for integrated working [20]. Interdisciplinary working remains under-developed in primary care and evaluation could highlight good practice, for example enabling the most effective local improvements, based on those designed to provide rapid access [29]. Clinical leadership is often under considerable operational pressure to demonstrate success of the integration of professional practices [30]. So, a commitment to allowing patient-facing teams to share experience and express priorities for integration is a core evaluation requirement. The use of qualitative data to represent 'telling cases' is critical to show how systems leadership has led to greater integration.

**Develop contractual arrangements:** Evaluations designed to inform innovations in service delivery, need pre-established stages and clear reporting requirements. Whilst evaluations can be rapid-cycle and feedback can be informal in nature, there is a requirement to maintain a timetable of activities within a relatively stable service delivery model, to allow for setting up data collection processes and to analyse and interpret these data. The evaluation team is often able to become an additional resource through the sharing of research evidence and comparative experience from other health context. This model of evaluation practice needs to be introduced and contracted carefully, in such a way as to make clear the purpose and value of the partnership, of site visits and observations [31]. Evaluation planning should include opportunities for organisational development through engaging community and professional stakeholders and formative and summative evaluation [23].

1  
2  
3 **Economic evaluation:** Evaluation teams require programme leaders to co-design the model  
4 of health economics recognising not only the return on investment but the value of the  
5 learning and leadership within the system. The increasing value on social justice in  
6 economic terms is a significant test of the local commitment to the cost and return on  
7 sustained organisational learning [32]. Shared understandings of the metrics by which  
8 population health improvements are being assessed are now critical. They serve to  
9 challenge assumptions that secondary care metrics, i.e. emergency admission data, is  
10 satisfactory. The design of the economic evaluation needs to reflect the original values  
11 associated with the shared quality improvement goal which in this case had three facets;  
12 improving care, managing demand and reducing hospital admissions. The attempt to  
13 identify value and attribute costs at systems level is required before integrated care services  
14 can be sustainably commissioned [29].  
15  
16  
17  
18  
19  
20  
21  
22  
23  
24  
25  
26

27 **Building capacity for evidence-based change:** Complex evaluation seeks to deliver the  
28 support for decision-making for services in 'practice-based' commissioning [33] and NHS  
29 England supported Vanguards to investigate their concerns about the level of unplanned  
30 admissions. A range of interventions could be effective in reducing these [34], with a view  
31 to re-designing care and promoting health improvement. Routinely collected metrics may  
32 be used to assess the quality and effectiveness of care provision and the choice of metric  
33 needs to be a careful consideration in relation to quality and cost impact. Vanguard  
34 evaluation enables an evidence-based approach to improvement but just as health  
35 professionals need a full understanding of the conditions they have to treat, academics  
36 undertaking evaluation need as full an understanding of the process as possible [35]. The  
37 engagement with the particular health system and a commitment to share the findings with  
38 stakeholders requires time and capacity to achieve the best outcomes for selected patient  
39 populations [36].  
40  
41  
42  
43  
44  
45  
46  
47  
48  
49  
50  
51

## 52 **Conclusion**

53  
54 Complex programme evaluation was a requirement of each NHS Vanguard sites, designed  
55 relative to the local improvements that were planned with services and across health and  
56 care systems. An academic team was recruited to increase capacity, insight and report  
57 findings of a local systems transformation. Improved evaluation processes may be needed  
58  
59  
60

1  
2  
3 to showcase the value of the investment in 'new ways of working' and to sustain system  
4 outputs. Better evaluation outcomes would be achieved with a) increased access to the  
5 frontline services and the process of integration b) contractual processes that enable  
6 evaluation teams to share interim findings and engage with complex dilemmas across the  
7 system c) clarification on a range of quality outcome metrics that would inform an economic  
8 evaluation thus helping commissioning to resist the considerable pressure to view short  
9 term cost savings and d) capacity building associated with the relevant research evidence to  
10 support local planning. National evaluation is currently being undertaken to identify the  
11 sustained changes that have taken place.  
12  
13  
14  
15  
16  
17  
18  
19  
20  
21

### 22 **Acknowledgement**

23 NIHR CLAHRC Yorkshire and Humber. [www.clahrc-yh.nihr.ac.uk](http://www.clahrc-yh.nihr.ac.uk) funded the open access publication.  
24  
25

26 The views expressed are those of the author(s), and not necessarily those of the NIHR or the Department of  
27 Health and Social Care.  
28

### 29 **Funder**

30  
31  
32 The evaluation research was funded by NHS England via the NHS Vanguard site (details of site withheld) and  
33 the evaluation report was published separately in conjunction with the NHS Vanguard Programme. This  
34 communication reflects on some of the findings from this work.  
35  
36  
37  
38

### 39 **Full references**

- 40  
41 1. England, N. H. S. (2016). New care models: Vanguards—developing a blueprint for the  
42 future of NHS and care services. *London: NHS England*.  
43  
44 2. NHS England (2014) Five Year Forward View [https://www.england.nhs.uk/wp-](https://www.england.nhs.uk/wp-content/uploads/2014/10/5yfv-web.pdf)  
45 [content/uploads/2014/10/5yfv-web.pdf](https://www.england.nhs.uk/wp-content/uploads/2014/10/5yfv-web.pdf) (last accessed 10.4.19  
46  
47 3. England, N. H. S. New care models: Vanguards-developing a blueprint for the future of  
48 NHS and care services; 2016.  
49  
50 4. England, N. H. S. (2015). New care models—vanguard sites. London: NHS England.  
51 Available online at [www.england.nhs.uk/ourwork/futurenhs/5yfv-ch3/new-care-](http://www.england.nhs.uk/ourwork/futurenhs/5yfv-ch3/new-care-models/)  
52 [models/](http://www.england.nhs.uk/ourwork/futurenhs/5yfv-ch3/new-care-models/)[Accessed 11 December 2015].  
53  
54 5. Humphries, R. (2015). Integrated health and social care in England—Progress and  
55 prospects. *Health Policy*, 119(7), 856-859.  
56  
57 6. Iacobucci, G. (2015). NHS England announces 29 sites to spearhead integrated care  
58 models. *BMJ: British Medical Journal (Online)*, 350.  
59  
60 7. Iacobucci G. NHS plan calls for new models of care and greater emphasis on prevention.

1  
2  
3 BMJ 2014;349:g6430. [www.bmj.com/content/349/bmj.g6430](http://www.bmj.com/content/349/bmj.g6430).

4  
5 8. Jones, L., Pomeroy, L., Robert, G., Burnett, S., Anderson, J. E., Morris, S., ... & Fulop, N.  
6 J. (2019). Explaining organisational responses to a board-level quality improvement  
7 intervention: findings from an evaluation in six providers in the English National Health  
8 Service. *BMJ Qual Saf*, 28(3), 198-204.

9  
10 9. Craig, P., Dieppe, P., Macintyre, S., Michie, S., Nazareth, I., & Petticrew, M. (2008).  
11 Developing and evaluating complex interventions: the new Medical Research Council  
12 guidance. *Bmj*, 337, a1655.

13  
14 10. Craig, P., Dieppe, P., Macintyre, S., Michie, S., Nazareth, I., & Petticrew, M. (2013).  
15 Developing and evaluating complex interventions: the new Medical Research Council  
16 guidance *International Journal of Nursing Studies* 50 ( 5) 587-592

17  
18 11. Moore, G. et al (2015) Process evaluation of complex interventions: Medical Research  
19 Council guidance. *Bmj* 2015;350

20  
21 12. NHS England (2016) New Care Models, Strategy for Evaluation for new care model  
22 vanguards [https://www.england.nhs.uk/wp-content/uploads/2015/07/ncm-evaluation-](https://www.england.nhs.uk/wp-content/uploads/2015/07/ncm-evaluation-strategy-may-2016.pdf)  
23 [strategy-may-2016.pdf](https://www.england.nhs.uk/wp-content/uploads/2015/07/ncm-evaluation-strategy-may-2016.pdf) (last accessed 10.4.2019)

24  
25 13. National Audit Office (2018) Developing new care models through NHS vanguards  
26 <https://www.nao.org.uk/report/developing-new-care-models-through-nhs-vanguards/> (last  
27 accessed 10.4.19)

28  
29 14. Freeman L, Hinks S (2018) At the forefront of evaluating complex system change: NHS  
30 England's approach, Operational Research and Evaluation Unit | Analytical Services

31  
32 NHS England [http://the-sra.org.uk/wp-content/uploads/freeman\\_and\\_hinks.pdf](http://the-sra.org.uk/wp-content/uploads/freeman_and_hinks.pdf) (last accessed  
33 10.4.19)

34  
35 15. Naylor, C., Charles, A. (2018). Developing new models of care in the PACS vanguards.  
36 London: King's Fund.

37  
38 16. Patton, M. Q. (2018). *Facilitating evaluation: Principles in practice*. Sage.

39  
40 17. McCoy, M., & Hargie, O. D. (2001). Evaluating evaluation: implications for assessing  
41 quality. *International Journal of Health Care Quality Assurance*, 14(7), 317-327.

42  
43 18. Patton, M. Q. (2013). The roots of utilization-focused evaluation. *Evaluation roots: a*  
44 *wider perspective of theorists*, 293-97.

45  
46 19. Patton MQ. *Principles-focused evaluation: The guide*. Guilford Publications; 2017 Oct 3.

47  
48 20. Fowler Davis, S., Piercy, H., Pearson, S., Thomas, B., & Kelly, S. (2018). Factors  
49 affecting decisions to extend access to primary care: results of a qualitative evaluation of  
50 general practitioners' views. *BMJ open*, 8(3), e019084.

51  
52 21. Varoutsas E, Scapens RW. Trust and control in evolving inter-organisational relationships:  
53 Evidence from the aerospace industry. *Accounting, Auditing & Accountability Journal*. 2018  
54 Jan 15;31(1):112-40.

- 1  
2  
3  
4  
5  
6  
7  
8  
9  
10  
11  
12  
13  
14  
15  
16  
17  
18  
19  
20  
21  
22  
23  
24  
25  
26  
27  
28  
29  
30  
31  
32  
33  
34  
35  
36  
37  
38  
39  
40  
41  
42  
43  
44  
45  
46  
47  
48  
49  
50  
51  
52  
53  
54  
55  
56  
57  
58  
59  
60
22. Ariss S, Perfect Patient Pathway Evaluation Report for NHS England TestBed Programme <https://www.england.nhs.uk/ourwork/innovation/test-beds/first-wave-of-test-beds/> (last accessed 6.5.19)
  23. Miller, R., Weir, C., & Gulati, S. (2018). Transforming primary care: scoping review of research and practice. *Journal of Integrated Care*.
  24. McCarthy, Grey and McMeekin, 'Economic Evaluation of New Models of Care: "Quick Wins" or Robust Methods' HESG Winter 2019 conference, 7th January 2019
  25. Kreif N, Grieve R, Hangartner D, Turner AJ, Nikolova S, Sutton M. Examination of the synthetic control method for evaluating health policies with multiple treated units. *Health economics*. 2016 Dec;25(12):1514-28.
  26. Aceijas C Assessing Evidence to improve Population Health and Wellbeing- Transforming Public Health Practice Learning Matters (2011)
  27. Drummond MF, Sculpher MJ, Claxton K, Stoddart GL, Torrance GW. *Methods for the economic evaluation of health care programmes*. Oxford university press; 2015 Sep 25.
  28. Nancarrow, S. A., Booth, A., Ariss, S., Smith, T., Enderby, P., & Roots, A. (2013). Ten principles of good interdisciplinary team work. *Human resources for Health*, 11(1), 19.
  29. Bodenheimer, T., Ghorob, A., Willard-Grace, R., & Grumbach, K. (2014). The 10 building blocks of high-performing primary care. *The Annals of Family Medicine*, 12(2), 166-171.
  30. Smith, T., Fowler-Davis, S., Nancarrow, S., Ariss, S. M. B., & Enderby, P. (2018). Leadership in interprofessional health and social care teams: a literature review. *Leadership in Health Services*.
  31. Chapman H,M, Murphy NF , Patton MQ (2017) A guiding typography for site visits in R.K. Nelson & D.L Roseland (Eds) *Conducting and Using Evaluative Site Visits*, New Directions for Evaluation 156, 11-19
  32. Dukhanin, V., Searle, A., Zwerling, A., Dowdy, D. W., Taylor, H. A., & Merritt, M. W. (2018). Integrating social justice concerns into economic evaluation for healthcare and public health: A systematic review. *Social Science & Medicine*, 198, 27-35.
  33. Smith, J., Dixon, J., Mays, N., McLeod, H., Goodwin, N., McClelland, S., ... & Wyke, S. (2005). The NHS revolution: health care in the market place: Practice based commissioning: applying the research evidence. *BMJ: British Medical Journal*, 331(7529), 1397.
  34. Purdy S, Paranjothy S, Huntley A, et al. Interventions to reduce unplanned hospital admission: a series of systematic reviews. Jun 2012.
  35. McCoy, M., & Hargie, O. D. (2001). Evaluating evaluation: implications for assessing quality. *International Journal of Health Care Quality Assurance*, 14(7), 317-327.
  36. Bardsley M, Steventon A, Smith J, Dixon J; Nuffield Trust. Evaluating integrated and community-based care: how do we know what works? Jun 2013
